# Supplementary material for: Chemistry education research trends: 2004–2013
Source: Royal Society of Chemistry journal article supplement (doi:10.1039/c4rp00104d), 2014-01-01
Supplement: c4rp00104d1.pdf [file c4rp00104d1.pdf]

## Electronic Supplementary Information

### A list of CER papers that met the review criteria for analysis in this study

Aalsvoort J. V., (2004), Activity theory as a tool to address the problem of chemistry's lack of relevance in secondary school chemical education, *Int. J. Sci. Educ.*, **26**(13), 1635–1651.

Aalsvoort J. V., (2004), Logical positivism as a tool to analyse the problem of chemistry's lack of relevance in secondary school chemical education, *Int. J. Sci. Educ.*, **26**(9), 1151–1168.

Abd-El-Khalick F., Waters M. and Le A.-P., (2008), Representations of nature of science in high school chemistry textbooks over the past four decade, *J. Res. Sci. Teach.*, **45**(7), 835-855.

Abdullah M., Mohamed N. and Ismail Z. H., (2009), The effect of an individualized laboratory approach through microscale chemistry experimentation on students' understanding of chemistry concepts, motivation and attitudes, *Chem. Educ. Res. Pract.*, **10**(1), 53-61.

Abraham M., Varghese V. and Tang H., (2010), Using molecular representations to aid student understanding of stereochemical concepts, *J. Chem. Educ.*, **87**(12), 1425-1429.

Acar B. and Tarhan L., (2008), Effects of cooperative learning on students' understanding of metallic bonding, *Res. Sci. Educ.*, **38**, 401-420.

Adadan E., (2013), Using multiple representations to promote grade 11 students' scientific understanding of the particle theory of matter, *Res. Sci. Educ.*, **43**, 1079-1105.

Adadan E., Irving K. E. and Trundle K. C., (2009), Impacts of multi-representational instruction on high school students' conceptual understandings of the particulate nature of matter, *Int. J. Sci. Educ.*, **31**(13), 1743-1775.

Adadan E. and Savasci F., (2012), An analysis of 16-17-year-old students' understanding of solution chemistry concepts using a two-tier diagnostic instrument, *Int. J. Sci. Educ.*, **34**(4), 513-544.

Adadan E., Trundle K. C. and Irving K. E., (2010), Exploring grade 11 students' conceptual pathways of the particulate nature of matter in the context of multirepresentational instruction, *J. Res. Sci. Teach.*, **47**(8), 1004-1035.

Adams G. M. and Lisy J. M., (2007), The chemistry merit program: Reaching, teaching, and retaining students in the chemical sciences, *J. Chem. Educ.*, **84**(4), 721-726.

Adams W. K., Wieman C. E., Perkins K. K. and Barbera J., (2008), Modifying and validating the Colorado Learning Attitudes about Science Survey for use in chemistry, *J. Chem. Educ.*, **85**(10), 1435-1439.

Adbo K. and Taber K. S., (2009), Learners' mental models of the particle nature of matter: A study of 16-year-old Swedish science students, *Int. J. Sci. Educ.*, **31**(6), 757-786.

Afonso A. S. and Gilbert J. K., (2013), The role of 'popular' books in informal chemical education, *Int. J. Sci. Educ. Part B*, **3**(1), 77-99.

Agung S. and Schwartz M. S., (2007), Students' understanding of conservation of matter, stoichiometry and balancing equations in Indonesia, *Int. J. Sci. Educ.*, **29**(13), 1679-1702.

Akaygun S. and Jones L. L., (2013), Research-based design and development of a simulation of liquid-vapor equilibrium, *Chem. Educ. Res. Pract.*, **14**(3), 324-344.

Aksela M. and Lundell J., (2008), Computer-based molecular modelling: Finnish school teachers' experiences and views, *Chem. Educ. Res. Pract.*, **9**(4), 301-308.

Al-Amoush S. A., Markic S. and Eilks I., (2012), Jordanian chemistry teachers' views on teaching practices and educational reform, *Chem. Educ. Res. Pract.*, **13**(3), 314-324.

Aldahmash A. H. and Abraham M. R., (2009), Kinetic versus static visuals for facilitating college students' understanding of organic reaction mechanisms in chemistry, *J. Chem. Educ.*, **86**(12), 1442-1446.

Amaral K. E. and Vala M., (2009), What teaching teaches: mentoring and the performance gains of mentors, *J. Chem. Educ.*, **86**(5), 630-633.

Amin T. G., Jeppsson F., Haglund J. and Strömdahl H., (2012), Arrow of time: metaphorical constructs of entropy and the second law of thermodynamics, *Sci. Educ.*, **96**, 818-848.

Anderson T. L. and Bodner G. M., (2008), What can we do about 'Parker'? A case study of a good student who didn't 'get' organic chemistry, *Chem. Educ. Res. Pract.*, **9**(2), 93-101.

- Antonoglou L. D., Charistos N. D. and Sigalas M. P., (2011), Design, development and implementation of a technology enhanced hybrid course on molecular symmetry: students' outcomes and attitudes, *Chem. Educ. Res. Pract.*, **12**(4), 454-468.
- Arasasingham R. D., Taagepera M., Potter F. and Lonjers S., (2004), Using knowledge space theory to assess student understanding of stoichiometry, *J. Chem. Educ.*, **81**(10), 1517-1523.
- Ardac D. and Akaygun S., (2005), Using static and dynamic visuals to represent chemical change at molecular level, *Int. J. Sci. Educ.*, **27**(11) 1269-1298.
- Ashkenazi G. and Weaver G. C., (2007), Using lecture demonstrations to promote the refinement of concepts: The case of teaching solvent miscibility, *Chem. Educ. Res. Pract.*, **8**(2), 186-196.
- Avramiotis S. and Tsapalis G., (2013), Using computer simulations in chemistry problem solving, *Chem. Educ. Res. Pract.*, **14**(3), 297-311.
- Aydin S. and Boz Y., (2013), The nature of integration among PCK components: a case study of two experienced chemistry teachers, *Chem. Educ. Res. Pract.*, **14**(4), 615-624.
- Ayyıldız Y. and Tarhan L., (2013), Case study applications in chemistry lesson: gases, liquids, and solids, *Chem. Educ. Res. Pract.*, **14**(4), 408-420.
- Azizoluğlu N., Alkan M. and Gerban Ö., (2006), Undergraduate pre-service teachers' understandings and misconceptions of phase equilibrium, *J. Chem. Educ.*, **83**(6), 947-953.
- Baddock M. and Bucat R., (2008), Effectiveness of a classroom chemistry demonstration using the cognitive conflict strategy, *Int. J. Sci. Educ.*, **30**(8), 1115-1128.
- Báez-Galib R., Colón-Cruz H., Resto W. and Rubin M. R., (2005), Chem-2-Chem: a one-to-one supportive learning environment for chemistry, *J. Chem. Educ.*, **82**(12), 1859-1863.
- Barak M. and Dori Y. J., (2005), Enhancing undergraduates students' chemistry understanding through project-based learning in an IT environment, *Sci. Educ.*, **89**, 117-139.
- Barak M., Zoller U. and Carson K. M., (2007), The "Chemistry is in the news" project: can a workshop induce a pedagogical change?, *J. Chem. Educ.*, **84**(10), 1712-1716.
- Barbera J., (2013), A psychometric analysis of the chemical concepts inventory, *J. Chem. Educ.*, **90**(5), 546-553.
- Barbosa R., Jófili, Z. and Watts, M., (2004), Cooperating in constructing knowledge: case studies from chemistry and citizenship, *Int. J. Sci. Educ.*, **26**(8), 935-949.
- Bartle E. K., Dook J. and Mocerino M., (2011), Attitudes of tertiary students towards a group project in a science unit, *Chem. Educ. Res. Pract.*, **12**(3), 303-311.
- Bauer C. F., (2005), Beyond "student attitudes": chemistry self-concept inventory for assessment of the affective component of student learning, *J. Chem. Educ.*, **82**(12), 1864-1870.
- Bauer C. F., (2008), Attitude towards chemistry: a semantic differential instrument for assessing curriculum impacts, *J. Chem. Educ.*, **85**(10), 1440-1445.
- Bauer C. F. and Cole R., (2012), Validation of an assessment rubric via controlled modification of a classroom activity, *J. Chem. Educ.*, **89**(9), 1104-1108.
- Becker N., Rasmussen C., Sweeney G., Wawro M., Towns M. and Cole R., (2013), Reasoning using particulate nature of matter: an example of a sociochemical norm in a university-level physical chemistry class, *Chem. Educ. Res. Pract.*, **14**(1), 81-94.
- Becker N. and Towns M., (2012), Students' understanding of mathematical expressions in physical chemistry contexts: an analysis using Sherin's symbolic forms, *Chem. Educ. Res. Pract.*, **13**(3), 209-220.
- Behmke D. A. and Atwood C. H., (2013), Implementation and assessment of Cognitive Load Theory (CLT) based questions in an electronic homework and testing system, *Chem. Educ. Res. Pract.*, **14**(3), 247-256.
- Bektas O., Ekiz B., Tuysuz M., Kutucu E. S., Tarkin A. and Uzuntiryaki-Kondakci E., (2013), Pre-service chemistry teachers' pedagogical content knowledge of the nature of science in the particle nature of matter, *Chem. Educ. Res. Pract.*, **14**(2), 201-213.
- Bell P. and Volckmann D., (2011), Knowledge surveys in general chemistry: confidence, overconfidence, and performance, *J. Chem. Educ.*, **88**(11), 1469-1476.
- Bellocchi A. and Ritchie S. M., (2011), Investigating and theorizing discourse during analogy writing in chemistry, *J. Res. Sci. Teach.*, **48**(7), 771-792.

- Bennett J., Gräsel C., Parchmann I. and Waddington D., (2005), Context-based and conventional approaches to teaching chemistry: comparing teachers' views, *Int. J. Sci. Educ.*, **27**(13), 1521-1547.
- Bennett J. M. and Sözbilir M., (2007), A study of Turkish chemistry undergraduates' understandings of entropy, *J. Chem. Educ.*, **84**(7), 1204-1208.
- Berg C. A. R., (2005), Factors related to observed attitude change toward learning chemistry among university students, *Chem. Educ. Res. Pract.*, **6**(1), 1-18.
- Bergendahl C. and Tibell L., (2005), Boosting complex learning by strategic assessment and course design, *J. Chem. Educ.*, **82**(4), 645-651.
- Bergin A., Sharp K., Gatlin T. A., Villalta-Cerdas A., Gower A. and Sandi-Urena S., (2013), Use of RateMyProfessors.com data as a supplemental tool for the assessment of general chemistry instruction, *J. Chem. Educ.*, **90**(3), 289-295.
- Bergqvist A., Drechsler M., De Jong O. and Rundgren S. C., (2013), Representations of chemical bonding models in school textbooks—help or hindrance for understanding?, *Chem. Educ. Res. Pract.*, **14**(4), 589-606.
- Bernholt S. and Parchmann I., (2011), Assessing the complexity of students' knowledge in chemistry, *Chem. Educ. Res. Pract.*, **12**(2), 167-173.
- Betancourt-Perez R., Olivera L. J. and Rodríguez J. E., (2010), Assessment of organic chemistry students' knowledge of resonance-related structures, *J. Chem. Educ.*, **87**(5), 547-551.
- Bhattacharyya G., (2006), Practitioner development in organic chemistry: how graduate students conceptualize organic acids, *Chem. Educ. Res. Pract.*, **7**(4), 240-247.
- Bhattacharyya G., (2013), From source to sink: mechanistic reasoning using the electron-pushing formalism, *J. Chem. Educ.*, **90**(10), 1282-1289.
- Bhattacharyya G. and Bodner G. M., (2005), "It gets me to the product": how students propose organic mechanisms, *J. Chem. Educ.*, **82**(4), 1402-1407.
- Bilsel A., Garip M. and Erdil E., (2006), Engineering faculty attitudes to general chemistry courses in engineering curricula, *J. Chem. Educ.*, **83**(12), 1873-1878.
- Bindernagel J. A. and Eilks I., (2009), Evaluating roadmaps to portray and develop chemistry teachers' PCK about curricular structures concerning sub-microscopic models, *Chem. Educ. Res. Pract.*, **10**(2), 77-85.
- Bird L., (2010), Logical reasoning ability and student performance in general chemistry, *J. Chem. Educ.*, **87**(5), 541-546.
- Bivall P., Ainsworth S. and Tibell L. A. E., (2011), Do haptic representations help complex molecular learning?, *Sci. Educ.*, **95**, 700-719.
- Blonder R., Jonatan M., Bar-Dov Z., Benny N., Rap S. and Sakhnini S., (2013), Can You Tube it? Providing chemistry teachers with technological tools and enhancing their self-efficacy beliefs, *Chem. Educ. Res. Pract.*, **14**(3), 269-285.
- Blonder R., Mamlok-Naaman R. and Hofstein A., (2008), Analyzing inquiry questions of high-school students in a gas chromatography open-ended laboratory experiment, *Chem. Educ. Res. Pract.*, **9**(3), 250-258.
- Blonder R. and Sakhnini S., (2012), Teaching two basic nanotechnology concepts in secondary school by using a variety of teaching methods, *Chem. Educ. Res. Pract.*, **13**(4), 500-516.
- Bond-Robinson J., (2005), Identifying pedagogical content knowledge (PCK) in the chemistry laboratory, *Chem. Educ. Res. Pract.*, **6**(2), 83-103.
- Bond-Robinson J. and Rodriques R. A. B., (2006), Catalyzing graduate teaching assistants' laboratory teaching through design research, *J. Chem. Educ.*, **83**(2), 313-323.
- Boudreaux A. and Campbell C., (2012), Student understanding of liquid-vapor phase equilibrium, *J. Chem. Educ.*, **89**(6), 707-714.
- BouJaoude S., Salloum S. and Abd-El-Khalick F., (2004), Relationships between selective cognitive variables and students' ability to solve chemistry problems, *Int. J. Sci. Educ.*, **21**(1), 63-84.
- Boukhechem M., Dumon A. and Zouikri M., (2011), The acquisition of stereochemical knowledge by Algerian students intending to teach physical sciences, *Chem. Educ. Res. Pract.*, **12**(3), 331-343.
- Bowman B. G., Karty J. M. and Gooch G., (2007), Teaching a modified Hendrickson, Cram, and Hammond curriculum in organic chemistry: curriculum redesign to

- turn around student performance, *J. Chem. Educ.*, **84**(7), 1209-1216.
- Boz Y. and Uzuntiryaki E., (2006), Turkish prospective chemistry teachers' beliefs about chemistry teaching, *Int. J. Sci. Educ.*, **28**(14), 1647-1667.
- Brandriet A. R., Xu X., Bretz S. L. and Lewis J. E., (2011), Diagnosing changes in attitude in first-year college chemistry students with a shortened version of Bauer's semantic differential, *Chem. Educ. Res. Pract.*, **12**(2), 271-278.
- Bretz S. L., Fay M., Bruck L. B. and Towns M. H., (2013), What faculty interviews reveal about meaningful learning in the undergraduate chemistry laboratory, *J. Chem. Educ.*, **90**(3), 281-288.
- Bridle C. A. and Yeziarski E. J., (2012), Evidence for the effectiveness of inquiry-based, particulate-level instruction on conceptions of the particulate nature of matter, *J. Chem. Educ.*, **89**(2), 192-198.
- Briggs M., Long G. and Owens K., (2011), Qualitative assessment of inquiry-based teaching methods, *J. Chem. Educ.*, **88**(8), 1034-1040.
- Brito A., Rodriguez M. A. and Niaz, M., (2005), A reconstruction of development of the periodic table based on history and philosophy of science and its implications for general chemistry textbooks, *J. Res. Sci. Teach.*, **42**(1), 84-111.
- Brooks B. J. and Koretsky M. D., (2011), The influence of group discussion on students' responses and confidence during peer instruction, *J. Chem. Educ.*, **88**(11), 1477-1484.
- Brown C. E., Henry M. L. M., Barbera J. and Hyslop R. M., (2012), A bridge between two cultures: uncovering the chemistry concepts relevant to the nursing clinical practice, *J. Chem. Educ.*, **89**(9), 1114-1121.
- Bruck A. D. and Towns M. H., (2009), Analysis of classroom response system questions via four lenses in a general chemistry course, *Chem. Educ. Res. Pract.*, **10**(4), 291-295.
- Bruck A. D. and Towns M., (2013), Development, implementation, and analysis of a national survey of faculty goals for undergraduate chemistry laboratory, *J. Chem. Educ.*, **90**(5), 685-693.
- Bruck L. B., Bruck A. D. and Phelps A. J., (2010), "Gone" into solution: assessing the effect of hands-on activity on students' comprehension of solubility, *J. Chem. Educ.*, **87**(1), 107-112.
- Bruck L. B., Towns M. and Bretz S. L., (2010), Faculty perspectives of undergraduate chemistry laboratory: goals and obstacles to success, *J. Chem. Educ.*, **87**(12), 1416-1424.
- Bulte A. M. W., Westbroek H. B., De Jong O. and Pilot A., (2006), A research approach to designing chemistry education using authentic practices as contexts, *Int. J. Sci. Educ.*, **28**(9), 1063-1086.
- Bunce D. M. and VandenPlas J. R., (2006), Student recognition and construction of quality chemistry essay responses, *Chem. Educ. Res. Pract.*, **7**(3), 160-169.
- Bunce D. M., VandenPlas J. R. and Havanki K. L., (2006), Comparing the effectiveness on student achievement of a student response system versus online WebCT quizzes, *J. Chem. Educ.*, **83**(3), 488-493.
- Bunce D. M., VandenPlas J. R. and Soulis C., (2011), Decay of student knowledge in chemistry, *J. Chem. Educ.*, **88**(9), 1231-1237.
- Burewicz A. and Miranowicz N., (2006), Effectiveness of multimedia laboratory instruction, *Chem. Educ. Res. Pract.*, **7**(1), 1-12.
- Burke K. A., Greenbowe T. J. and Gelder J. I., (2004), The multi-initiative dissemination project workshops: who attends them and how effective are they?, *J. Chem. Educ.*, **81**(6), 897-902.
- Burmeister M. and Eilks I., (2012), An example of learning about plastics and their evaluation as a contribution to education for sustainable development in secondary school chemistry teaching, *Chem. Educ. Res. Pract.*, **13**(2), 93-102.
- Burmeister M., Schmidt-Jacob S. and Eilks I., (2013), German chemistry teachers' understanding of sustainability and education for sustainable development—an interview case study, *Chem. Educ. Res. Pract.*, **14**(2), 169-176.
- Cacciatore K. L. and Seviran H., (2009), Incrementally approaching an inquiry lab curriculum: can changing a single laboratory experiment improve student performance in general chemistry?, *J. Chem. Educ.*, **86**(4), 498-505.

- Cakmakci G., (2010), Identifying alternative conceptions of chemical kinetics among secondary school and undergraduate students in Turkey, *J. Chem. Educ.*, **87**(4), 449-455.
- Cakmakci G. and Aydogdu C., (2011), Designing and evaluating an evidence-informed instruction in chemical kinetics, *Chem. Educ. Res. Pract.*, **12**(1), 15-28.
- Cakmakci G., Leach J. and Donnelly J., (2006), Students' ideas about reaction rate and its relationship with concentration or pressure, *Int. J. Sci. Educ.*, **28**(15), 1795-1815.
- Calatayud M., Bárcenas S. L. and Furió-Más C., (2007), Surveying students' conceptual and procedural knowledge of acid-base behavior of substances, *J. Chem. Educ.*, **84**(10), 1717-1724.
- Çalik M. and Ayas A., (2005), A comparison of level of understanding of eight-grade students and science student teachers related to selected chemistry concepts, *J. Res. Sci. Teach.*, **42**(6), 638-667.
- Canpolat N., (2006), Turkish undergraduates' misconceptions of evaporation, evaporation rate, and vapour pressure, *Int. J. Sci. Educ.*, **28**(15), 1757-1770.
- Canpolat N., Pinarbasi T. and Sözbilir M., (2006), Prospective teachers' misconceptions of vaporization and vapor pressure, *J. Chem. Educ.*, **83**(8), 1237-1242.
- Cartrette D. P. and Bodner G. M., (2010), Non-mathematical problem solving in organic chemistry, *J. Res. Sci. Teach.* **47**(6), 643-660.
- Cartrette D. P. and Mayo P. M., (2011), Students' understanding of acids/bases in organic chemistry contexts, *Chem. Educ. Res. Pract.*, **12**(1), 29-39.
- Chandrasegaran A. L., Treagust D. F. and Mocerino M., (2007), The development of a two-tier multiple-choice diagnostic instrument for evaluating secondary school students' ability to describe and explain chemical reactions using multiple levels of representation, *Chem. Educ. Res. Pract.*, **8**(3), 293-307.
- Chandrasegaran A. L., Treagust D. F. and Mocerino M., (2008), An evaluation of a teaching intervention to promote students' ability to use multiple levels of representation when describing and explaining chemical reactions, *Res. Sci. Educ.*, **38**, 237-248.
- Chandrasegaran A. L., Treagust D. F., Waldrip B. G. and Chandrasegaran A., (2009), Students' dilemmas in reaction stoichiometry problem solving: deducing the limiting reagent in chemical reactions, *Chem. Educ. Res. Pract.*, **10**(1), 14-23.
- Chang C.-Y., Hsiao C.-H. and Barufaldi J. P., (2006), Preferred-actual learning environment "spaces" and earth science outcomes in Taiwan, *Sci. Educ.*, **90**, 420-433.
- Chang, H.-Y., Quintana C. and Krajcik J. S., (2010), The impact of designing and evaluating molecular animations on how well middle school students understand the particulate nature of matter, *Sci. Educ.*, **94**, 73-94.
- Chang H.-Y. and Chang H.-C., (2013), Scaffolding students' online critiquing of expert- and peer-generated molecular models of chemical reactions, *Int. J. Sci. Educ.*, **35**(12), 2028-2056.
- Chang H.-Y. and Linn M. C., (2013), Scaffolding learning from molecular visualizations, *J. Res. Sci. Teach.*, **50**(7), 858-886.
- Chase A., Pakhira D. and Stains M., (2013), Implementing process-oriented, guided-inquiry learning for the first time: adaptations and short-term impacts on students' attitude and performance, *J. Chem. Educ.*, **90**(4), 409-416.
- Chatterjee S., Williamson V. M., McCann K. and Peck M. L., (2009), Surveying students' attitudes and perceptions toward guided-inquiry and open-inquiry laboratories, *J. Chem. Educ.*, **86**(12), 1427-1432.
- Chen, H.-J., She J.-L., Chou C.-C., Tsai Y.-M. and Chiu M.-H., (2013), Development and application of a scoring rubric for evaluating students' experimental skills in organic chemistry: an instructional guide for teaching assistants, *J. Chem. Educ.*, **90**(10), 1296-1302.
- Cheng M. M. W. and Gilbert J. K., (2013), Students' visualization of metallic bonding and the malleability of metals, *Int. J. Sci. Educ.*, DOI 10.1080/09500693.2013.867089.
- Cheung D., (2009), Developing a scale to measure students' attitude towards chemistry lessons, *Int. J. Sci. Educ.*, **31**(16), 2185-2203.
- Cheung D., (2009), The adverse effects of Le Châtelier's principle on teacher understanding of chemical equilibrium, *J. Chem. Educ.*, **83**(8), 514-518.

- Cheung D., (2009), Students' attitudes toward chemistry lessons: the interaction effect between grade level and gender, *Res. Sci. Educ.*, **39**, 75-91.
- Cheung D., (2009), Using think-aloud protocols to investigate secondary school chemistry teachers' misconceptions about chemical equilibrium, *Chem. Educ. Res. Pract.*, **10**(2), 97-108.
- Cheung D., (2011), Teacher beliefs about implementing guided-inquiry laboratory experiments for secondary school chemistry, *J. Chem. Educ.*, **88**(11), 1462-1468.
- Cheung D., (2011), Using diagnostic assessment to help teachers understand the chemistry of the lead-acid battery, *Chem. Educ. Res. Pract.*, **12**(2), 228-237.
- Childs P. E. and Sheehan M., (2009), What's difficult about chemistry? An Irish perspective, *Chem. Educ. Res. Pract.*, **10**(3), 204-218.
- Chittleborough G. and Treagust D. F., (2007), The modelling ability of non-major chemistry students and their understanding of the sub-microscopic level, *Chem. Educ. Res. Pract.*, **8**(3), 274-292.
- Chittleborough G. and Treagust D. F., (2008), Correct interpretation of chemical diagrams requires transforming from one level of representation to another, *Res. Sci. Educ.*, **38**, 463-482.
- Chiu M.-H., (2007), A national survey of students' conceptions of chemistry in Taiwan, *Int. J. Sci. Educ.*, **29**(4), 421-452.
- Chiu M.-H. and Lin J.-W., (2005), Promoting fourth graders' conceptual change of their understanding of electric current via multiple analogies, *J. Res. Chem. Teach.*, **42**(4), 429-464.
- Choi A., Hand B. and Greenbowe T., (2013), Students' written arguments in general chemistry laboratory investigations, *Res. Sci. Educ.* **43**, 1763-1783.
- Christian B. N. and Yezierski E. J., (2012), Development and validation of an instrument to measure student knowledge gains for chemical and physical change for grades 6-8, *Chem. Educ. Res. Pract.*, **13**(3), 384-393.
- Christian K. and Talanquer V., (2012), Modes of reasoning in self-initiated study groups in chemistry, *Chem. Educ. Res. Pract.*, **13**(3), 286-295.
- Claesgens J., Scalise K., Wilson M. and Stacy A., (2009), Mapping student understanding in chemistry: the perspectives of chemists, *Sci. Educ.*, **93**, 56-85.
- Clifton R. A., Baldwin W. G. and Wei Y., (2012), Course structure, engagement, and the achievement of students in first-year chemistry, *Chem. Educ. Res. Pract.*, **13**(1), 47-52.
- Cloonan C. A. and Hutchinson J. S., (2011), A Chemistry Concept Reasoning Test, *Chem. Educ. Res. Pract.*, **12**(2), 205-209.
- Cokelez A., (2010), A comparative study of French and Turkish students' ideas on acid-base reactions, *J. Chem. Educ.*, **87**(1), 102-106.
- Cokelez A. and Dumon A., (2005), Atom and molecule: Upper secondary school French students' representations in long-term memory, *Chem. Educ. Res. Pract.*, **6**(3), 119-135.
- Cokelez A., Dumon A. and Taber K. S., (2008), Upper secondary French students, chemical transformations and the "register of models": a cross-sectional study, *Int. J. Sci. Educ.*, **30**(6) 807-836.
- Cook E., Kennedy E. and McGuire S. Y., (2013), Effect of teaching metacognitive learning strategies on performance in general chemistry courses, *J. Chem. Educ.*, **30**(8), 961-967.
- Cooper M. M., Corley L. M. and Underwood S. M., An investigation of college chemistry students' understanding of structure-property relationships, *J. Res. Sci. Teach.*, **50**(6), 699-721.
- Cooper M. M., Cox C. T. Jr., Nammouz M., Case E. and Stevens R., (2008), An assessment of the effect of collaborative groups on students' problem-solving strategies and abilities, *J. Chem. Educ.*, **85**(6), 866-872.
- Cooper M. M., Grove N., Underwood S. M. and Klymkowsky M. W., (2010), Lost in Lewis structures: an investigation of student difficulties in developing representational competence, *J. Chem. Educ.*, **87**(8), 869-874.
- Cooper M. M. and Kerns T. S., (2006), Changing the laboratory: effects of a laboratory course on students' attitudes and perceptions, *J. Chem. Educ.*, **83**(9), 1356-1361.
- Cooper M. M. and Sandi-Urena S., (2009), Design and validation of an instrument to assess metacognitive

- skillfulness in chemistry problem solving, *J. Chem. Educ.*, **86**(2), 240-245.
- Cooper M. M., Sandi-Urena S. and Stevens R., (2008), Reliable multi method assessment of metacognition use in chemistry problem solving, *Chem. Educ. Res. Pract.*, **9**(1), 18-24.
- Cooper M. M., Underwood S. M. and Hilley C. Z., (2012), Development and validation of the implicit information from Lewis structures instrument (IILSI): do students connect structures with properties?, *Chem. Educ. Res. Pract.*, **13**(3), 195-200.
- Cooper M. M., Underwood S. M., Hilley C. Z. and Klymkowsky M. W., (2012), Development and assessment of a molecular structure and properties learning progression, *J. Chem. Educ.*, **89**(11), 1351-1357.
- Corrigan D., (2009), Chemistry teacher education to promote understanding of learning through effective reflective practice, *Chem. Educ. Res. Pract.*, **10**(2), 121-131.
- Coştu B., (2008), Big bubbles in boiling liquids: students' views, *Chem. Educ. Res. Pract.*, **9**(3), 219-224.
- Coştu B., Ayas A. and Niaz M., (2010), Promoting conceptual change in first year students' understanding of evaporation, *Chem. Educ. Res. Pract.*, **11**(1), 5-16.
- Cousins A., (2007), Gender inclusivity in secondary chemistry: a study of male and female participants in secondary school chemistry, *Int. J. Sci. Educ.*, **29**(6), 711-730.
- Cracolice S. M., Deming J. C. and Ehlert B., (2008), Concept learning versus problem solving: a cognitive difference, *J. Chem. Educ.*, **85**(6), 873-878.
- Crespo, M. Á., and Pozo, J. I. (2004). Relationships between everyday knowledge and scientific knowledge: understanding how matter changes. *Int. J. Sci. Educ.*, **26**(11), 1325-1343.
- Crisp M. G., Kable S. H., Read J. R. and Buntine M. A., (2011), A disconnect between staff and student perceptions of learning: an ACELL educational analysis of the first year undergraduate chemistry experiment 'investigating sugar using a home made polarimeter, *Chem. Educ. Res. Pract.*, **12**(4), 469-477.
- Criswell B. A., (2012), Reducing the degrees of freedom in chemistry classroom conversations, *Chem. Educ. Res. Pract.*, **13**(1), 17-29.
- Danili E. and Reid N., (2005), Assessment formats: do they make a difference?, *Chem. Educ. Res. Pract.*, **6**(4), 204-212.
- Danili E. and Reid N., (2006), Cognitive factors that can potentially affect pupils' test performance, *Chem. Educ. Res. Pract.*, **7**(2), 64-83.
- Danjuma I. M., (2011), Methods used by pre-service Nigeria Certificate in Education teachers in solving quantitative problems in chemistry, *Chem. Educ. Res. Pract.*, **12**(4), 427-433.
- Davidowitz B., Chittleborough G. and Murray E., (2010), Student-generated submicro diagrams: a useful tool for teaching and learning chemical equations and stoichiometry, *Chem. Educ. Res. Pract.*, **11**(3), 154-164.
- Davidowitz B. and Rollnick M., (2011), What lies at the heart of good undergraduate teaching? A case study in organic chemistry, *Chem. Educ. Res. Pract.*, **12**(3), 355-366.
- Davila K. and Talanquer V., (2010), Classifying end-of-chapter questions and problems for selected general chemistry textbooks used in the United States, *J. Res. Sci. Teach.*, **47**(1), 97-101.
- De Berg K., (2012), A study of first-year chemistry students' understanding of solution concentration at the tertiary level, *Chem. Educ. Res. Pract.*, **13**(1), 8-16.
- De Jong O., Driel J. H. van. and Verloop N., (2005), Preservice teachers' pedagogical content knowledge of using particle models in teaching chemistry, *J. Res. Sci. Teach.*, **42**(8), 947-964.
- Del Carlo D. I. and Bodner G. M., (2004), Students' perceptions of academic dishonesty in the chemistry classroom laboratory, *J. Res. Sci. Teach.*, **41**(1), 47-64.
- DeMeo S., (2007), Constructing a graphic organizer in the classroom: introductory students' perception of achievement using a decision map to solve aqueous acid-base equilibria problems, *J. Chem. Educ.*, **84**(3), 540-546.
- DeMeo S., (2007), How do new teachers choose new labs?, *J. Chem. Educ.*, **84**(10), 1702-1705.

- Demircioğlu G., Ayas A. and Demircioğlu H., (2005), Conceptual change achieved through a new teaching program on acids and bases, *Chem. Educ. Res. Pract.*, **6**(1),36-51.
- Demircioğlu H., Demircioğlu G. and Çalik M., (2009), Investigating the effectiveness of storylines embedded within a context-based approach: the case for the Periodic Table, *Chem. Educ. Res. Pract.*, **10**(3), 241-249.
- Devetak I., Lorber E. D., Jurišević M. and Glažar S. A., (2009), Comparing Slovenian year 8 and year 9 elementary school pupils' knowledge of electrolyte chemistry and their intrinsic motivation, *Chem. Educ. Res. Pract.*, **10**(4), 281-290.
- Devetak I., Vogrinc J. and Glažar S. A., (2009), Assessing 16-year old students' understanding of aqueous solution at submicroscopic level, *Res. Sci., Educ.*, **39**, 157-179.
- Dianovsky M. T. and Wink D. J., (2012), Student learning through journal writing in a general education chemistry course for pre-elementary education majors, *Sci. Educ.*, **96**, 543-565.
- Diederer J., Gruppen H., Hartog R. and Voragen A. G. J. (2005), Evaluation of computer-based learning material for food chemistry education, *Chem. Educ. Res. Pract.*, **6**(2), 64-82.
- Ding N. and Harskamp E. G., (2011), Collaboration and peer tutoring in chemistry laboratory education, *Int. J. Sci. Educ.*, **33**(6), 839-863.
- Dolfing R., Bulte M. W. A., Pilot A. and Vermunt J. D., (2012), Domain-specific expertise of chemistry teachers on context-based education about macro-micro thinking in structure-property relations, *Res. Sci. Educ.*, **42**, 567-588.
- Domin D. and Bodner G., (2012), Using Students' representations constructed during problem solving to infer conceptual understanding, *J. Chem. Educ.*, **89**(7), 837-843.
- Domin D. S., (2007), Students' perceptions of when conceptual development occurs during laboratory instruction, *Chem. Educ. Res. Pract.*, **8**(2), 140-152.
- Domin D. S., (2008), Using an advance organizer to facilitate change in students' conceptualisation of the role of creativity in science, *Chem. Educ. Res. Pract.*, **9**(4), 291-300.
- Domin D. S., Al-Masum M. and Mensah J., (2008), Students' categorizations of organic compounds, *Chem. Educ. Res. Pract.*, **9**(2), 114-121.
- Donnelly D., O'Reilly J. and McGarr O., (2013), Enhancing the student experiment experience: visible scientific inquiry through a virtual chemistry laboratory, *Res. Sci. Educ.*, **43**, 1571-1592.
- Dori Y. J. and Sasson I., (2008), Chemical understanding and graphing skills in an honors case-based computerized chemistry laboratory environment: the value of bidirectional visual and textual representations, *J. Res. Sci. Teach.*, **45**(2), 219-250.
- Doymus K., (2007), Effects of a cooperative learning strategy on teaching and learning phases of matter and one-component phase diagrams, *J. Chem. Educ.*, **84**(11), 1857-1860.
- Doymus K., (2008), Teaching chemical equilibrium with the jigsaw technique, *Res. Sci. Educ.*, **38**, 249-260.
- Drechsler M. and Schmidt H., (2005), Textbooks' and teachers' understanding of acid-base models used in chemistry teaching, *Chem. Educ. Res. Pract.*, **6**(1), 19-35.
- Drechsler M. and Driel J. van., (2008), Experiences teachers' pedagogical content knowledge of teaching acid-base chemistry, *Res. Sci. Educ.*, **38**, 611-631.
- Drechsler M. and Driel J. van., (2009), Teachers' perceptions of the teaching of acids and bases in Swedish upper secondary schools, *Chem. Educ. Res. Pract.*, **10**(2), 86-96.
- Driel J. H. van., Bulte A. M. W. and Verloop N., (2005), The conceptions of chemistry teachers about teaching and learning in the context of a curriculum innovation, *Int. J. Sci. Educ.*, **27**(3), 303-322.
- Duis J. M., (2011), Organic chemistry educators' perspectives on fundamental concepts and misconceptions: an exploratory study, *J. Chem. Educ.*, **88**(3), 346-350.
- Duis J. M., Schafer L. L., Nussbaum S. and Stewart J. J., (2013), A process for developing introductory science laboratory learning goals to enhance student learning and instructional alignment, *J. Chem. Educ.*, **90**(9), 1144-1150.
- Easter, D. C., (2010), Factors influencing student prerequisite preparation for and subsequent performance in college chemistry two: a statistical investigation, *J. Chem. Educ.*, **87**(5), 535-540.



- Eichler M. L., Del Pino J. C. and Fagundes L. C., (2004), Development of cognitive conducts during a computer simulated environmental analysis, *Chem. Educ. Res. Pract.*, **5**(2), 157-174.
- Eichler J. F. and Peeples J., (2013), Online homework put to the test: a report on the impact of two online learning systems on students performance in general chemistry, *J. Chem. Educ.*, **90**(9), 1137-1143.
- Eilks I., (2005), Experiences and reflections about teaching atomic structure in a jigsaw classroom in lower secondary school chemistry lessons, *J. Chem. Educ.*, **82**(2), 313-319.
- Eissen M., (2012), Sustainable production of chemicals—an educational perspective, *Chem. Educ. Res. Pract.*, **13**(2), 103-111.
- El-Faragy N., (2009), Chemistry for student nurses: applications-based learning, *Chem. Educ. Res. Pract.*, **10**(3), 250-260.
- Ellis J. T., (2013), Assessing the development of chemistry students' conceptual and visual understanding of dimensional analysis via supplemental use of web-based software, *J. Chem. Educ.*, **90**(5), 554-560.
- Emenike M., Raker J. R. and Holme T., (2013), Validating chemistry faculty members' self-reported familiarity with assessment terminology, *J. Chem. Educ.*, **90**(9), 1130-1136.
- Erny C., Bouvier D., Bloch G., Laemmel C. and Leseney A., (2006), Assessing the educational effectiveness of a CAL tutorial. Structure and molecular dynamics in biology; Part 1: Water and molecular interactions, *Chem. Educ. Res. Pract.*, **7**(4), 248-265.
- Eskandar F., Bayrami M., Vahedi S. and Ansar V. A. A., (2013), The effect of instructional analogies in interaction with logical thinking ability on achievement and attitude toward chemistry, *Chem. Educ. Res. Pract.*, **14**(4), 566-575.
- Essex J., (2011), An exploration of the effects of mentoring on post-16 chemistry students' exam performance, *Chem. Educ. Res. Pract.*, **12**(1), 68-73.
- Evans K. L., Leinhardt G., Karabinos M. and Yaron D., (2006), Chemistry in the field and chemistry in the classroom: a cognitive disconnect?, *J. Chem. Educ.*, **83**(4), 655-661.
- Evans K. L., Yaron D. and Leinhardt G., (2008), Learning stoichiometry: a comparison of text and multimedia formats, *Chem. Educ. Res. Pract.*, **9**(3), 208-218.
- Eymur G., Çetin P. and Geban Ö., (2013), Analysis of the alternative conceptions of preservice teachers and high school students concerning atomic size, *J. Chem. Educ.*, **90**(8), 976-980.
- Fach M., de Boer T. and Parchmann I., (2007), Results of an interview study as basis for the development of stepped supporting tools for stoichiometric problems, *Chem. Educ. Res. Pract.*, **8**(1), 13-31.
- Farré A. S. and Lorenzo M. G., (2009), Another piece of the puzzle: the relationship between beliefs and practice in higher education organic chemistry, *Chem. Educ. Res. Pract.*, **10**(2), 176-184.
- Fay M. E., Grove N. P., Towns M. H. and Bretz S. L., (2007), A rubric to characterize inquiry in the undergraduate chemistry laboratory, *Chem. Educ. Res. Pract.*, **8**(2), 212-219.
- Feierabend T., Jokmin S. and Eilks I., (2011), Chemistry teachers' views on teaching 'climate change'—an interview case study from research-oriented learning in teacher education, *Chem. Educ. Res. Pract.*, **12**(1), 85-91.
- Ferguson R. and Bodner G. M., (2008), Making sense of the arrow-pushing formalism among chemistry majors enrolled in organic chemistry, *Chem. Educ. Res. Pract.*, **9**(2), 102-113.
- Flores A. and Smith K. C., (2013), Spanish-speaking English language learners' experiences in high school chemistry education, *J. Chem. Educ.*, **90**(2), 152-158.
- Frailich M., Kesner M. and Hofstein A., (2009), Enhancing students' understanding of the concept of *chemical bonding* by using activities provided on an interactive website, *J. Res. Sci. Teach.*, **46**(3), 289-310.
- Franco A. G. and Taber K. S., (2009), Secondary students' thinking about familiar phenomena: learners' explanations from a curriculum context where 'particles' is a key idea for organising teaching and learning, *Int. J. Sci. Educ.*, **31**(14), 1917-1952.
- Frändberg B., Lincoln P. and Wallin A., (2013), Linguistic resources used in grade 8 students' submicro level explanations—science items from TIMSS 2007, *Res. Sci. Educ.*, **43**, 2387-2406.

- Furió-Más C., Calatayud M. L., Guisasola J. and Furió-Gómez, (2005), How are the concepts and theories of acid-base reactions presented? Chemistry in textbooks and as presented by teachers, *Int. J. Sci. Educ.*, **27**(11), 1337-1358.
- Gafney L. and Varma-Nelson P., (2007), Evaluating peer-led team learning: a study of long-term effects on former workshop peer leaders, *J. Chem. Educ.*, **84**(3), 535-539.
- Gallos M. R., Berg E. van den and Treagust D. F., (2005), The effect of integrated course and faculty development: experiences of a university chemistry department in the Philippines, *Int. J. Sci. Educ.*, **27**(8), 985-1006.
- Ganaras K., Dumon A. and Larcher C., (2008), Conceptual integration of chemical equilibrium by prospective physical sciences teachers, *Chem. Educ. Res. Pract.*, **9**(3), 240-249.
- Garland E. R. and Garland H. T., (2006), Preparation for high school chemistry: the effects of a summer school course on student achievement, *J. Chem. Educ.*, **83**(11), 1698-1702.
- Garritano J. R. and Culp F. B., (2010), Chemical information instruction in Academe: who is leading the charge?, *J. Chem. Educ.*, **87**(3), 340-344.
- Gauchon L. and Méheut M., (2007), Learning about stoichiometry: from students' preconceptions to the concept of limiting reactant, *Chem. Educ. Res. Pract.*, **8**(4), 362-375.
- Gebru M. T., Phelps A. J. and Wulfsberg G., (2012), Effect of clickers versus online homework on students' long-term retention of general chemistry course material, *Chem. Educ. Res. Pract.*, **13**(3), 325-329.
- Gellene G. I. and Bentley A. B., (2005), A six-year study of the effects of a remedial course in the chemistry curriculum, *J. Chem. Educ.*, **82**(1), 125-130.
- Gifford L. K., Eckenrode H. M. and Rogers L. C., (2004), A partnership incorporating labs into an existing chemistry curriculum: access science, *J. Chem. Educ.*, **81**(10), 1505-1509.
- Gkitzia V., Salta K. and Tzougraki C., (2011), Development and application of suitable criteria for the evaluation of chemical representations in school textbooks, *Chem. Educ. Res. Pract.*, **12**(1), 5-14.
- Golde M. F., McCearry C. L. and Koeske R. (2006), Peer instruction in the general chemistry laboratory: assessment of student learning, *J. Chem. Educ.*, **83**(5), 804-810.
- Gomes M. F. C., Mortimer E. F. and Kelly G. J., (2011), Contrasting stories of inclusion/exclusion in the chemistry classroom, *Int. J. Sci. Educ.*, **33**(6), 747-772.
- Gopal H., Kleinsmidt J., Case J. and Musonge P., (2004), An investigation of tertiary students' understanding of evaporation, condensation and vapour pressure, *Int. J. Sci. Educ.*, **26**(13), 1597-1620.
- Graulich N., Tiemann R. and Schreiner P. R., (2012), Heuristic chemistry—a qualitative study on teaching domain-specific strategies for the six-electron case, *Chem. Educ. Res. Pract.*, **13**(3), 337-347.
- Green G. and Rollnick M., (2006), The role of structure of the discipline in improving student understanding: the case of organic chemistry, *J. Chem. Educ.*, **82**(1), 1376-1381.
- Greenbowe T. J., Poock J. R., Burke K. A. and Hand B. M., (2007), Using the science writing heuristic in the general chemistry laboratory to improve students' academic performance, *J. Chem. Educ.*, **82**(1), 1371-1379.
- Greenbowe T. J., Rudd J. A. II. and Hand B. M., (2007), Using the science writing heuristic to improve students' understanding of general equilibrium, *J. Chem. Educ.*, **84**(12), 2007-2011.
- Gregorius R. M., Santos R., Dano J. B. and Gutierrez J. J., (2010), Can animations effectively substitute for traditional teaching methods? Part I: Preparation and testing of materials, *Chem. Educ. Res. Pract.*, **11**(4), 253-261.
- Gregorius R. M., Santos R., Dano J. B. and Gutierrez J. J., (2010), Can animations effectively substitute for traditional teaching methods? Part II: Potential for differentiated learning, *Chem. Educ. Res. Pract.*, **11**(4), 262-266.
- Gron L. U., Bradley S. B., McKenzie J. R., Shinn S. E. and Teague M. W., (2013), How to recognize success and failure: practical assessment of an evolving, first-semester laboratory program using simple, outcome-based tools, *J. Chem. Educ.*, **90**(6), 694-699.
- Gron L. U., Hales D. A. and Teague M. W., (2007), Creating a research-rich chemistry curriculum with an integrated, upper-level-undergraduate laboratory program, *J. Chem. Educ.*, **84**(8), 1343-1347.
- Grove N. and Bretz S. L., (2007), CHEMX: an instrument to assess students' cognitive expectations for learning chemistry, *J. Chem. Educ.*, **84**(9), 1524-1529.

- Grove N. P., Cooper M. M. and Cox E. L., (2012), Does mechanistic thinking improve student success in organic chemistry?, *J. Chem. Educ.*, **89**(7), 850-853.
- Grove N. P., Cooper M. M. and Rush K. M., (2012), Decorating with arrows: toward the development of representational competence in organic chemistry, *J. Chem. Educ.*, **89**(7), 844-849.
- Grove N. P. and Bretz S. L., (2010), Perry's Scheme of Intellectual and Epistemological Development as a framework for describing student difficulties in learning organic chemistry, *Chem. Educ. Res. Pract.*, **11**(3), 207-211.
- Grove N. P. and Bretz S. L., (2012), A continuum of learning: from rote memorization to meaningful learning in organic chemistry, *Chem. Educ. Res. Pract.*, **13**(3), 201-208.
- Grove N. P., Hershberger J. W. and Bretz S. L., (2008), Impact of a spiral organic curriculum on student attrition and learning, *Chem. Educ. Res. Pract.*, **9**(2), 157-162.
- Grunert M. L. and Bodner G. M., (2011), Finding fulfillment: women's self-efficacy beliefs and career choices in chemistry, *Chem. Educ. Res. Pract.*, **12**(4), 420-426.
- Gulacar O., Overton T. L., Bowman C. R. and Fynewever H., (2013), A novel code system for revealing sources of students' difficulties with stoichiometry, *Chem. Educ. Res. Pract.*, **14**(4), 507-515.
- Hadenfeldt J. C., Bernholt S., Liu X. and Parchmann I., (2013), Using ordered multiple-choice items to assess students' understanding of the structure and composition of matter, *J. Chem. Educ.*, **90**(12), 1602-1608.
- Hadfield L. C. and Wieman C. E., (2010), Student interpretations of equations related to the first law of thermodynamics, *J. Chem. Educ.*, **87**(7) 750-755.
- Haglund J. and Jeppsson F., (2012), Using self-generated analogies in teaching of thermodynamics, *J. Res. Sci. Teach.*, **49**(7), 898-921.
- Hahn K. E. and Polik W. F., (2004), Factors influencing success in physical chemistry, *J. Chem. Educ.*, **81**(4), 567-572.
- Haigh M., France B. and Gounder R., (2012), Confounding confusion? When illustrative practical work falls short of its purpose—a case study, *Res. Sci. Educ.*, **44**, 967-984.
- Hailikari T. K. and Nevgi A., (2010), How to diagnose at-risk students in chemistry: the case of prior knowledge assessment, *Int. J. Sci. Educ.*, **32**(15), 2079-2095.
- Haláková Z. and Prokša M., (2007), Two kinds of conceptual problems in chemistry teaching, *J. Chem. Educ.*, **84**(1), 172-174.
- Hall M. V., Wilson L. A. and Sanger M. J., (2012), Student success in intensive versus traditional introductory college chemistry courses, *J. Chem. Educ.*, **89**(9), 1109-1113.
- Han J. and Roth W.-M., (2006), Chemical inscriptions in Korean textbooks: semiotics of macro- and microworld, *Sci. Educ.*, **90**, 173-201.
- Hand B. and Choi A., (2010), Representations in constructing arguments in organic chemistry laboratory classes, *Res. Sci., Educ.*, **40**, 29-44.
- Harrison A. G. and De Jong O., (2005), Exploring the use of multiple analogical models when teaching and learning chemical equilibrium, *J. Res. Sci. Teach.*, **42**(10), 1135-1159.
- Harsh J. A., Maltese A. V. and Tai R. H., (2012), A perspective of gender differences in chemistry and physics undergraduate research experiences, *J. Chem. Educ.*, **89**(12), 1364-1370.
- Harshman J., Bretz S. L. and Yeziarski E., (2013), Seeing chemistry through the eyes of the blind: a case study examining multiple gas law representations, *J. Chem. Educ.*, **90**(6), 710-716.
- Hartman J. A. and Lin S., (2011), Analysis of student performance on multiple-choice questions in general chemistry, *J. Chem. Educ.*, **88**(9), 1223-1230.
- Hatzinikita V., Koulaidis, V. and Hatzinikitas, A. (2005), Modeling pupils' understanding and explanations concerning changes in matter, *Res. Sci. Educ.*, **35**, 471-495.
- Hawkins I. and Phelps A. J., (2013), Virtual laboratory vs. traditional laboratory: which is more effective for teaching electrochemistry?, *Chem. Educ. Res. Pract.*, **14**(4), 516-523.
- Hein S. M., (2012), Positive impacts using POGIL in organic chemistry, *J. Chem. Educ.*, **89**(7), 860-864.
- Heredia K. and Lewis J. E., (2012), A psychometric evaluation of The Colorado Learning Attitudes about

- Science Survey for use in chemistry, *J. Chem. Educ.*, **89**(4), 436–441.
- Heredia K., Xu X. and Lewis J. E., (2012), The application and evaluation of a two-concept diagnostic instrument with students entering college general chemistry, *Chem. Educ. Res. Pract.*, **13**(1), 30-38.
- Herrington D. G., Luxford K. and Yeziarski E. J., (2012), Target inquiry: helping teachers use a research experience to transform their teaching practices, *J. Chem. Educ.*, **89**(4), 442–448.
- Herrington D. G., Yeziarski E. J., Luxford K. M. and Luxford C. J., (2011), Target inquiry: changing chemistry high school teachers' classroom practices and knowledge and beliefs about inquiry instruction, *Chem. Educ. Res. Pract.*, **12**(1), 74-84.
- Herrmann-Abell C. F. and DeBoer G. E., (2011), Using distractor-driven standards-based multiple-choice assessments and Rasch modeling to investigate hierarchies of chemistry misconceptions and detect structural problems with individual items, *Chem. Educ. Res. Pract.*, **12**(2), 184-192.
- Hilton A. and Nichols K., (2011), Representational classroom practices that contribute to students' conceptual and representational understanding of chemical bonding,, *Int. J. Sci. Educ.*, **33**(16), 2215-2246.
- Hinze S. R., Williamson V. M., Deslongchamps G., Shultz M. J., Williamson K. C. and Rapp D. N., (2013), Textbook treatments of electrostatic potential maps in general and organic chemistry, *J. Chem. Educ.*, **90**(10), 1275-1281.
- Hockings S. C., DeAngelis K. J. and Frey R. F., (2008), Peer-led team learning in general chemistry: implementation and evaluation, *J. Chem. Educ.*, **85**(7), 990-996.
- Hofstein A., Navon O., Kipnis M. and Mamlok-Naaman R., (2005), Developing students' ability to ask more and better questions resulting from inquiry-type chemistry laboratories, *J. Res. Sci. Teach.*, **42**(7), 791-806.
- Hofstein A., Shore R., and Kipnis M., (2004), Providing high school chemistry students with opportunities to develop learning skills in an inquiry-type laboratory: a case study. *Int. J. Sci. Educ.*, **21**(1), 47-62.
- Högström P., Ottander C. and Benckert S., (2010), Lab work and learning in secondary school chemistry: the importance of teacher and student interaction, *Res. Sci. Educ.*, **40**, 505-523.
- Holme T. and Murphy K., (2011), Assessing conceptual and algorithmic knowledge in general chemistry with ACS exams, *J. Chem. Educ.*, **88**(9), 1217-1222.
- Hosten C. M., Talanova G. and Lipkowitz K. B., (2011), Introducing undergraduates to the role of science in public policy and in the service of the community, *Chem. Educ. Res. Pract.*, **12**(3), 388-394.
- Howard K. E., Brown S. A., Chung S. H., Jobson B. T. and VanReken T. M., (2013), College students' understanding of atmospheric ozone formation, *Chem. Educ. Res. Pract.*, **14**(1), 51-61.
- Hume A. and Berry A., (2013), Enhancing the practicum experience for pre-service chemistry teachers through collaborative CoRe design with mentor teachers, *Res. Sci. Educ.*, **43**, 2107-2136.
- Hume D. L., Carson K. M., Hodgen B. and Glaser R. E., (2006), Chemistry is in the news: assessment of student attitudes toward authentic news media-based learning activities, *J. Chem. Educ.*, **83**(4), 662-667.
- Igaz C. and Prokša M., (2012), Conceptual questions and lack of formal reasoning: are they mutually exclusive?, *J. Chem. Educ.*, **89**(10), 1243-1248.
- Jaber L. Z. and BouJaoude S., (2012), A macro-micro-symbolic teaching to promote relational understanding of chemical reactions, *Int. J. Sci. Educ.*, **34**(7), 973-998.
- Jacob C., (2004), Critical thinking in the chemistry classroom and beyond, *J. Chem. Educ.*, **81**(8), 1216-1223.
- Jagodziński P. and Wolski R., (2012), Assessing the educational effectiveness of films of chemical experiments for educating deaf-mute junior high and high school students, *J. Chem. Educ.*, **89**(9), 1122–1127.
- Jakab C., (2013), Small talk: children's everyday 'molecule' ideas, *Res. Sci. Educ.*, **43**, 1307-1325.
- Jalil P. A., (2006), A procedural problem in laboratory teaching: experiment and explain, or vice-versa?, *J. Chem. Educ.*, **83**(1), 159-163.
- Jennings K. T., Epp E. M. and Weaver G. C., (2007), Use of a multimedia DVD for physical chemistry: analysis of its effectiveness for teaching content and applications to

- current research and its impact on student views of physical chemistry, *Chem. Educ. Res. Pract.*, **8**(3), 308-326.
- Jiménez-Aleixandre M.-P. and Reigosa C., (2006), Contextualizing practices across epistemic levels in the chemistry laboratory, *Sci. Educ.*, **90**, 707-733.
- Johnson P., (2005), The development of children's concept of a substance: a longitudinal study of interaction between curriculum and learning, *Res. Sci. Educ.*, **35**, 41-61.
- Johnson P. and Papageorgiou G., (2010), Rethinking the introduction of particle theory: a substance-based framework, *J. Res. Sci. Teach.*, **47**(2), 130-150.
- Johnson P. and Tymms P., (2011), The emergence of a learning progression in middle school chemistry, *J. Res. Sci. Teach.*, **48**(8), 849-877.
- Jones K. B. and Gellene G. I., (2005), Understanding attrition in an introductory chemistry sequence following successful completion of a remedial course, *J. Chem. Educ.*, **82**(8), 1241-1245.
- José T. J. and Williamson V. M., (2005), Molecular visualization in science education: an evaluation of an NSF-sponsored workshop, *J. Chem. Educ.*, **82**(6), 937-943.
- José T. J. and Williamson V. M., (2008), The effects of a two-year molecular visualization experience on teachers' attitudes, content knowledge, and spatial ability, *J. Chem. Educ.*, **85**(5), 718-723.
- Josephsen J. and Kristensen A. K., (2006), Simulation of laboratory assignments to support students' learning of introductory inorganic chemistry, *Chem. Educ. Res. Pract.*, **7**(4), 266-279.
- Jurišević M., Glažar S. A., Pučko C. R. and Devetak I., (2008), Intrinsic motivation of pre-service primary school teachers for learning chemistry in relation to their academic achievement, *Int. J. Sci. Educ.*, **30**(1), 87-107.
- Jurišević M., Vrtačnik M., Kwiatkowski M. and Gros N., (2012), The interplay of students' motivational orientations, their chemistry achievements and their perception of learning within the hands-on approach to visible spectrometry, *Chem. Educ. Res. Pract.*, **13**(3), 237-247.
- Justi R. and Driel J. van., (2005), A case study of the development of a beginning chemistry teacher's knowledge about models and modelling, *Res. Sci. Educ.*, **35**, 197-219.
- Kabapinar F., Leach J. and Scott P., (2004), The design and evaluation of a teaching-learning sequence addressing the solubility concept with Turkish secondary school students, *Int. J. Sci. Educ.*, **26**(5), 635-652.
- Kahveci A., (2009), Exploring chemistry teacher candidates' profile characteristics, teaching attitudes and beliefs, and chemistry conceptions, *Chem. Educ. Res. Pract.*, **10**(2), 109-120.
- Kahveci A., (2010), Quantitative analysis of science and chemistry textbooks for indicators of reform: a complementary perspective, *Int. J. Sci. Educ.*, **32**(11), 1495-1519.
- Kahveci A., Gilmer P. J. and Southerland S. A., (2008), Understanding chemistry professors' use of educational technologies: an activity theoretical approach, *Int. J. Sci. Educ.*, **30**(3), 325-351.
- Katchevich D., Hofstein A. and Mamlok-Naaman R., (2013), Argumentation in the chemistry laboratory: inquiry and confirmatory experiments, *Res. Sci. Educ.*, **43**, 317-345.
- Kaya E., (2013), Argumentation practices in classroom: pre-service teachers' conceptual understanding of chemical equilibrium, *Int. J. Sci. Educ.*, **35**(7), 1139-1158.
- Kaya O. N. (2008), A student-centred approach: assessing the changes in prospective science teachers' conceptual understanding y concept mapping in a general chemistry laboratory, *Res. Sci. Educ.*, **38**, 91-110.
- Kelly O. and Finlayson O., (2009), A hurdle too high? Students' experience of a PBL laboratory module, *Chem. Educ. Res. Pract.*, **10**(1), 42-52.
- Kelly R. M., Barrera J. H. and Mohamed S. C., (2010), An analysis of undergraduate general chemistry students' misconceptions of the submicroscopic level of precipitation reactions, *J. Chem. Educ.*, **87**(1), 113-118.
- Kelly R. M. and Jones L. L. (2008), Investigating students' ability to transfer ideas learned from molecular animations of the dissolution process, *J. Chem. Educ.*, **85**(2), 303-309.
- Kendhammer L., Holme T. and Murphy K., (2013), Identifying differential performance in general chemistry: differential item functioning analysis of ACS general chemistry trial tests, *J. Chem. Educ.* **90**(7), 846-853.
- Kennepohl D., Guay M. and Thomas V., (2010), Using an online, self-diagnostic test for introductory general

- chemistry at an Open University, *J. Chem. Educ.*, **87**(11), 1273-1277.
- Kermen I. and Méheut, (2009), Different models used to interpret chemical changes: analysis of a curriculum and its impact on French students' reasoning, *Chem. Educ. Res. Pract.*, **10**(1), 24-34.
- Kerman I. and Méheut M., (2011), Grade 12 French students' use of a thermodynamic model for predicting the direction of incomplete chemical changes, *Int. J. Sci. Educ.*, **33**(13), 1745-1773.
- Kern A. L., Wood N. B., Roehrig G. H. and Nyachwaya J., (2010), A qualitative report of the ways high school chemistry students attempt to represent a chemical reaction at the atomic/molecular level, *Chem. Educ. Res. Pract.*, **11**(3), 165-172.
- Khan S., (2007), Model-based inquiries in chemistry, *Sci. Educ.*, **91**, 877-905.
- Kibar Z. B., Yaman F. and Ayas A., (2013), Assessing prospective chemistry teachers' understanding of gases through qualitative and quantitative analyses of their concept maps, *Chem. Educ. Res. Pract.*, **14**(4), 542-554.
- Kind V., (2009), A conflict in your head: an exploration of trainee science teachers' subject matter knowledge development and its impact on teacher self-confidence, *Int. J. Sci. Educ.*, **31**(11), 1529-1562.
- Kind V., (2013), A degree is not enough: a quantitative study of aspects of pre-service science teachers' chemistry content knowledge, *Int. J. Sci. Educ.*, DOI 10.1080/09500693.2013.860497.
- Kind V. and Kind P. M., (2011), Beginning to teach chemistry: How personal and academic characteristics of pre-service science teachers compare with their understandings of basic chemical ideas, *Int. J. Sci. Educ.*, **33**(15), 2123-2158.
- King D., Bellocchi, A. and Ritchie, S. M., (2008), Making connections: learning and teaching chemistry in context, *Res. Sci. Educ.*, **38**, 365-384.
- King D. and Domin D. S., (2007), The representation of people of color in undergraduate general chemistry textbooks, *J. Chem. Educ.*, **84**(2), 342-345.
- King D. T. and Ritchie S. M., (2013), Academic success in context-based chemistry: Demonstrating fluid transitions between concepts and context, *Int. J. Sci. Educ.*, **35**(7), 1159-1182.
- Kingir S., Geban O. and Gunel M., (2012), How does the science writing heuristic approach affect students' performances of different academic achievement levels? A case for high school chemistry, *Chem. Educ. Res. Pract.*, **13**(4), 428-436.
- Kingir S., Geban O. and Gunel M., (2013), Using the science writing heuristic approach to enhance student understanding in chemistry change and mixture, *Res. Sci. Educ.*, **43**, 1645-1663.
- Kirbulut Z. D. and Beeth M. E., (2013), Consistency of students' ideas across evaporation, condensation, and boiling, *Res. Sci. Educ.*, **43**, 209-232.
- Kırık Ö. T. and Boz Y., (2012), Cooperative learning instruction for conceptual change in the concepts of chemical kinetics, *Chem. Educ. Res. Pract.*, **13**(3), 221-236.
- Kishbaugh T. L. S., Cessna S., Horst S. J., Leaman L., Flanagan T., Neufeld D. G. and Siderhurst M., (2012), Measuring beyond content: a rubric bank for assessing skills in authentic research assignments in the sciences, *Chem. Educ. Res. Pract.*, **13**(3), 268-276.
- Knaus K., Murphy K., Blecking A. and Holme T., (2011), A valid and reliable instrument for cognitive complexity rating assignment of chemistry exam items, *J. Chem. Educ.*, **88**(5), 554-560.
- Kraft A., Strickland A. M. and Bhattacharyya G., (2010), Reasonable reasoning: multi-variate problem-solving in organic chemistry, *Chem. Educ. Res. Pract.*, **11**(4), 281-292.
- Krause M., Kienast S., Witteck T. and Eilks I., (2013), On the development and assessment of a computer-based learning and assessment environment for the transition from lower to upper secondary chemistry education, *Chem. Educ. Res. Pract.*, **14**(3), 345-353.
- Krnel D., Watson R. & Glazar S. A., (2005), The development of the concept of 'matter': a cross-age study of how children describe materials, *Int. J. Sci. Educ.*, **27**(3), 367-383.
- Kruse R. A. and Roehrig G. H., (2005), A comparison Study: assessing teachers' conceptions with the chemistry concepts inventory, *J. Chem. Educ.*, **82**(8), 1246-1250.

- Krystyniak R. A. and Heikkinen H. W., (2007), Analysis of verbal interactions during an extended, open-inquiry general chemistry laboratory investigation, *J. Res. Sci. Teach.*, **44**(8), 1160-1186.
- Kulatunga U. and Lewis J. E., (2013), Exploration of peer leader verbal behaviors as they intervene with small groups in college general chemistry, *Chem. Educ. Res. Pract.*, **14**(4), 576-588.
- Kulatunga U., Moog R. S., and Lewis J. E., (2013), Argumentation and participation patterns in general chemistry peer-led sessions, *J. Res. Sci. Teach.*, **50**(10), 1207-1231.
- Kumi B. C., Olimpo J. T., Bartlett F. and Dixon B. L., (2013), Evaluating the effectiveness of organic chemistry textbooks in promoting representational fluency and understanding of 2D-3D diagrammatic relationships, *Chem. Educ. Res. Pract.*, **14**(2), 177-187.
- Kurbanoglu N. I., Taskesenligil Y. and Sozbilir M., (2006), Programmed instruction revisited: a study on teaching stereochemistry, *Chem. Educ. Res. Pract.*, **7**(1), 13-21.
- Lacosta-Gabari I., Fernández-Manzanal R. and Sánchez-González D., (2009), Designing, testing, and validating an attitudinal survey on an environmental topic: a groundwater pollution survey instrument for secondary school students, *J. Chem. Educ.*, **86**(9), 1099-1103.
- Laius A., Kask K. and Rannikmäe, M., (2009), Comparing outcomes from two case studies on chemistry teachers' readiness to change, *Chem. Educ. Res. Pract.*, **10**(2), 142-153.
- Lang Q. C., Wong A. F. L. and Fraser B., (2005), Student perceptions of chemistry laboratory learning environments, student-teacher interactions and attitudes in secondary school gifted education classes in Singapore, *Res. Sci. Educ.*, **35**, 299-321.
- Lanigan K. C., (2008), Teaching analytical method development in an undergraduate instrumental analysis course, *J. Chem. Educ.*, **85**(1), 138-140.
- Lastusaari M. and Murtonen M., (2013), University chemistry students' learning approaches and willingness to change major, *Chem. Educ. Res. Pract.*, **14**(4), 496-506.
- Lee S. T., Treagust, D. and Lin H.-S., (2005), Chemistry teachers' estimations of their students' learning achievement, *J. Chem. Educ.*, **82**(10), 1565-1569.
- Leinhardt G., Cuadros J. and Yaron D., (2007), "One firm spot": the role of homework as lever in acquiring conceptual and performance competence in college chemistry, *J. Chem. Educ.*, **84**(6), 1047-1052.
- Leite L., Mendoza J. and Borsese A., (2007), Teachers' and prospective teachers' explanation of liquid-state phenomena: a comparative study involving three european countries, *J. Res. Sci. Teach.*, **44**(2), 349-374.
- Leopold D. G. and Edgar B., (2008), Degree of mathematics fluency and success in second-semester introductory chemistry, *J. Chem. Educ.*, **85**(5), 724-731.
- Levy Nahum T., Hofstein A., Mamlok-Naaman R. and Bar-Dov Z., (2004), Can final examinations amplify students' misconceptions in chemistry? *Chem. Educ. Res. Pract.*, **5**(3), 301-325.
- Levy Nahum T., Mamlok-Naaman R., Hofstein A. and Krajcik J., (2007), Developing a new teaching approach for the chemical bonding concept aligned with current scientific and pedagogical knowledge, *Sci. Educ.*, **91**, 579-603.
- Lewis A. L. M. and Bodner G. M., (2013), Chemical reactions: what understanding do students with blindness develop?, *Chem. Educ. Res. Pract.*, **14**(4), 625-636.
- Lewis S. E., (2011). Retention and reform: an evaluation of peer-led-team learning, *J. Chem. Educ.*, **88**(6), 703-707.
- Lewis S. E. and Lewis J. E., (2005), Departing from lectures: An evaluation of a peer-led guided inquiry alternative, *J. Chem. Educ.*, **82**(1), 135-139.
- Lewis S. E. and Lewis J. E., (2006), Effectiveness of a workshop to encourage action: Evaluation from a post-workshop survey, *J. Chem. Educ.*, **83**(2), 299-304.
- Lewis S. E. and Lewis J. E., (2007), Predicting at-risk students in general chemistry: comparing formal thought to a general achievement measure, *Chem. Educ. Res. Pract.*, **8**(1), 32-51.
- Lewis S. E. and Lewis J. E., (2008), Seeking effectiveness and equity in a large college chemistry course: an HLM investigation of peer-led guided inquiry, *J. Res. Sci. Teach.*, **45**(7), 794-811.
- Lewis S. E., Shaw J. L. and Freeman K. A., (2011), Establishing open-ended assessments: investigating the validity of creative exercises, *Chem. Educ. Res. Pract.*, **12**(2), 158-166.

- Lewis S. E., Shaw J. L., Heitz J. O. and Webster, G. H., (2009), Attitude counts: self-concept and success in general chemistry, *J. Chem. Educ.*, **86**(6), 744-749.
- Lewthwaite B. E., (2008), Towards treating chemistry teacher candidates as human, *Res. Sci. Educ.*, **38**, 343-363.
- Lewthwaite B. and Wiebe R., (2011), Fostering teacher development to a tetrahedral orientation in the teaching of chemistry, *Res. Sci. Educ.*, **41**, 667-689.
- Li W.-T., Liang J.-C. and Tsai C.-C., (2013), Relational analysis of college chemistry-major students' conceptions of and approaches to learning chemistry, *Chem. Educ. Res. Pract.*, **14**(4), 555-565.
- Liang J.-C., Chou C.-C. and Chiu M.-H., (2011), Student test performances on behavior of gas particles and mismatch of teacher predictions, *Chem. Educ. Res. Pract.*, **12**(2), 238-250.
- Limniou M., Papadopoulos N., Giannakoudakis A., Roberts D. and Otto O., (2007), The integration of a viscosity simulator in a chemistry laboratory, *Chem. Educ. Res. Pract.*, **8**(2), 220-231.
- Lin J.-W. and Chiu M.-H., (2007), Exploring the characteristics and diverse sources of students' mental models of acids and bases, *Int. J. Sci. Educ.*, **29**(6), 771-803.
- Lin J.-W. and Chiu M.-H., (2010), The mismatch between students' mental models of acids/bases and their sources and their teacher's anticipations thereof, *Int. J. Sci. Educ.*, **32**(12), 1617-1646.
- Linenberger K. J. and Bretz S. L., (2012), Generating cognitive dissonance in student interviews through multiple representations, *Chem. Educ. Res. Pract.*, **13**(3), 172-178.
- Liu X., (2007), Elementary to high school students' growth over an academic year in understanding the concept of matter, *J. Chem. Educ.*, **83**(2), 1853-1856.
- Liu X. and Lesniak K. M., (2005), Students' progression of understanding the matter concept from elementary to high school, *Sci. Educ.*, **89**, 433-450.
- Liu X. and Lesniak K., (2006), Progression in children's understanding of the matter concept from elementary to high school, *J. Res. Sci. Teach.*, **43**(3), 320-347.
- Löfgren L. and Helldén G., (2009), A longitudinal study showing how students use a molecule concept when explaining everyday situations, *Int. J. Sci. Educ.*, **31**(12), 1631-1655.
- Long G. L., Bailey C. A., Bunn B. B., Slebodnick C., Johnson M. R., Derozier S., Dana S. M. and Grady J. R., (2012), Chemistry outreach project to high schools using a mobile chemistry laboratory, ChemKits, and teacher workshops, *J. Chem. Educ.*, **89**(10), 1249-1258.
- Lopez E., Kim J., Nandagopal K., Cardin N., Shavelson R. J. and Penn J. H., (2011), Validating the use of concept-mapping as a diagnostic assessment tool in organic chemistry: Implications for teaching, *Chem. Educ. Res. Pract.*, **12**(2), 133-141.
- Lopez E., Nandagopal K., Shavelson R. J., Szu E. and Penn J., (2013), Self-regulated learning study strategies and academic performance in undergraduate organic chemistry: an investigation examining ethnically diverse students, *J. Res. Sci. Teach.*, **50**(6), 660-676.
- Lubezky A., Dori Y. J. and Zoller U., (2004), HOCS-promoting assessment of students' performance on environment-related undergraduate chemistry, *Chem. Educ. Res. Pract.*, **5**(2), 175-184.
- Lucas T. and Rowley N. M., (2011), Enquiry-based learning: experiences of first year chemistry students learning spectroscopy, *Chem. Educ. Res. Pract.*, **12**(4), 478-486.
- Luft J. A. and Roehrig G. H., (2004), Inquiry teaching in high school chemistry classrooms: the role of knowledge and beliefs, *J. Chem. Educ.*, **81**(10), 1510-1516.
- Luxford C. J. and Bretz S. L., (2013), Moving beyond definitions: what student-generated models reveal about their understanding of covalent bonding and ionic bonding, *Chem. Educ. Res. Pract.*, **14**(2), 214-222.
- Lyll R., (2005), The strategies used by distance education students when learning basic chemistry; implications for electronic delivery, *Chem. Educ. Res. Pract.*, **6**(3), 150-165.
- Lyon D. C. and Lagowski J. J., (2008), Effectiveness of facilitating small-group learning in large lecture classes, *J. Chem. Educ.*, **85**(11), 1571-1576.
- MacArthur J. R. and Jones L., (2013), Self-assembled student interactions in undergraduate general chemistry clicker classrooms, *J. Chem. Educ.*, **90**(12), 1586-1589.



- Madden S. P., Jones L. L. and Rahm J., (2011), The role of multiple representations in the understanding of ideal gas problems, *Chem. Educ. Res. Pract.*, **12**(3), 283-293.
- Maeyer J. and Talanquer V., (2010), The role of intuitive heuristics in students' thinking: ranking chemical substances, *Sci. Educ.*, **94**, 963-984.
- Maeyer J. and Talanquer V., (2013), Making predictions about chemical reactivity: assumptions and heuristics, *J. Res. Sci. Teach.*, **50**(6), 748-767.
- Mahalingam M., Schaefer F. and Morlino E., (2008), Promoting student learning through group problem solving in general chemistry recitations, *J. Chem. Educ.*, **85**(11), 1577-1581.
- Mamlok-Naaman R., Blonder R. and Hofstein A., (2010), Providing chemistry teachers with opportunities to enhance their knowledge in contemporary scientific areas: a three-stage model, *Chem. Educ. Res. Pract.*, **11**(4), 241-252.
- Mandler D., Mamlok-Naaman R., Blonder R., Yayon M. and Hofstein A., (2012), High-school chemistry teaching through environmentally oriented curricula, *Chem. Educ. Res. Pract.*, **13**(2), 80-92.
- Margel H., Eylon B. and Scherz Z., (2004), "We actually saw atoms with our own eyes": conceptions and convictions in using the scanning tunneling microscope in junior high school, *J. Chem. Educ.*, **81**(4), 558-556.
- Margel H., Eylon B. and Scherz Z., (2008), A longitudinal study of junior high school students' conceptions of the structure of materials, *J. Res. Sci. Teach.*, **45**(1), 132-152.
- Markic S. and Eilks I., (2008), A case study on German first year chemistry student teachers' beliefs about chemistry teaching, and their comparison with student teachers from other science teaching domains, *Chem. Educ. Res. Pract.*, **9**(1), 25-34.
- Markic S. and Eilks I., (2010), First-year science education student teachers' beliefs about student- and teacher-centeredness: parallels and differences between chemistry and other science teaching domains, *J. Chem. Educ.*, **87**(3), 335-339.
- Martínez-Losada C. and García-Barros S., (2005), Do Spanish secondary school teachers really value different sorts of procedural skills?, *Int. J. Sci. Educ.*, **27**(7), 827-854.
- Mavropoulos A., Roulia M. and Petrou A. L., (2004), An interdisciplinary model for teaching the topic "foods": a contribution to modern chemistry education, *Chem. Educ. Res. Pract.*, **5**(2), 143-155.
- Mayer K., (2011), Addressing students' misconceptions about gases, mass, and composition, *J. Chem. Educ.*, **88**(1), 111-115.
- Mazzarone K. M. and Grove N. P., (2013), Understanding epistemological development in first- and second-year chemistry students, *J. Chem. Educ.*, **90**(8), 968-975.
- Mazzaro D., Page S. and Carlo D. D., (2006), High school students' perceptions of their laboratory classroom and the copying of laboratory work, *J. Chem. Educ.*, **83**(9), 1362-1367.
- McClary L. and Bretz S. L., (2012), Development and assessment of a diagnostic tool to identify organic chemistry students' alternative conceptions related to acid strength, *Int. J. Sci. Educ.*, **34**(15), 2317-2341.
- McClary L. and Talanquer V., (2011), College chemistry students' mental models of acids and acid strength, *J. Res. Sci. Teach.*, **48**(4), 396-413.
- McClary L. and Talanquer V., (2011), Heuristic reasoning in chemistry: making decisions about acid strength, *Int. J. Sci. Educ.*, **33**(10), 1433-1454.
- Meissner B. and Bogner F., (2011), Enriching students' education using interactive workstations at a salt mine turned science center, *J. Chem. Educ.*, **88**(4), 510-515.
- Merino C. and Sanmarti N., (2008), How young children model chemical change, *Chem. Educ. Res. Pract.*, **9**(3), 196-207.
- Mendonça P. C. C. and Justi R., (2011), Contributions of the model of modelling diagram to the learning of ionic bonding: analysis of a case study, *Res. Sci. Educ.*, **41**, 479-503.
- Miller L. S., Nakhleh M. B., Nash J. J. and Meyer J. A., (2004), Students' attitudes toward and conceptual understanding of chemical instrumentation, *J. Chem. Educ.*, **81**(12), 1801-1808.
- Mills P., Sweeney W. and Bonner S. M., (2009), Using the first exam for student placement in beginning chemistry courses, *J. Chem. Educ.*, **86**(6), 738-743.

- Mitchell Y. D., Ippolito J. and Lewis S. E., (2012), Evaluating peer-led team learning across the two semester general chemistry sequence, *Chem. Educ. Res. Pract.*, **13**(3), 378-383.
- Mocerino M., Chandrasegaran A. L. and Treagust D. F., (2009), Emphasizing multiple levels of representation to enhance students' understandings of the changes occurring during chemical reactions, *J. Chem. Educ.*, **86**(12), 1433-1436.
- Moore E. B., Herzog T. A. and Perkins K. K., (2013), Interactive simulations as implicit support for guided-inquiry, *Chem. Educ. Res. Pract.*, **14**(3), 257-268.
- Morgil İ., Arda S., Seçken N., Yavuz S. and Özyalçın Oskay Ö., (2004), The influence of computer-assisted education on environmental knowledge and environmental awareness, *Chem. Educ. Res. Pract.*, **5**(2), 99-110.
- Morgil I., Yavuz S., Özyalçın Oskay Ö. and Arda S., (2005), Traditional and computer-assisted learning in teaching acids and bases, *Chem. Educ. Res. Pract.*, **6**(1), 52-63.
- Mutambuki J. and Fynewever H., (2012), Comparing chemistry faculty beliefs about grading with grading practices, *J. Chem. Educ.*, **89**(3), 326-334.
- Muthyala R. S. and Wei W., (2013), Does space matter? Impact of classroom space on student learning in an organic-first curriculum, *J. Chem. Educ.*, **90**(1), 45-50.
- Murphy K., (2012), Using a personal response system to map cognitive efficiency and gain insight into a proposed learning progression in preparatory chemistry, *J. Chem. Educ.*, **89**(10), 1229-1235.
- Naah B. M. and Sanger M. J., (2012), Student misconceptions in writing balanced equations for dissolving ionic compounds in water, *Chem. Educ. Res. Pract.*, **13**(3), 186-194.
- Nakhleh M. B., Samarapungavan A. and Saglam Y., (2005), Middle school students' beliefs about matter, *J. Res. Sci. Teach.*, **42**(5), 581-612.
- Nakiboglu C., (2008), Using word associations for assessing non major science students' knowledge structure before and after general chemistry instruction: the case of atomic structure, *Chem. Educ. Res. Pract.*, **9**(4), 309-322.
- Naughton W., Schreck J. and Heikkinen H., (2008), Seeking evidence for "curricular relevancy" within undergraduate, liberal arts chemistry textbooks, *J. Res. Sci. Teach.*, **45**(2), 174-196.
- Neber H. and Anton M., (2008), Promoting pre-experimental activities in high-school chemistry: focusing on the role of students' epistemic questions, *Int. J. Sci. Educ.*, **30**(13), 1801-1821.
- Neely M. B., (2007), Using technology and other assistive strategies to aid students with disabilities in performing chemistry lab tasks, *J. Chem. Educ.*, **84**(10), 1697-1701.
- Niaz M. and Coştu B., (2009), Presentation of atomic structure in Turkish general chemistry textbooks, *Chem. Educ. Res. Pract.*, **10**(3), 233-240.
- Niaz M. and Fernández R., (2008), Understanding quantum numbers in general chemistry textbooks, *Int. J. Sci. Educ.*, **30**(7), 869-901.
- Nieswandt M., (2007), Student affect and conceptual understanding in learning chemistry, *J. Res. Sci. Teach.*, **44**(7), 908-937.
- Nilsson T. and Niedderer H., (2012), An analytical tool to determine undergraduate students' use of volume and pressure when describing expansion work and technical work, *Chem. Educ. Res. Pract.*, **13**(3), 348-356.
- Noh T., Cha J., Kang S. and Scharmann L. C., (2004), Perceived professional needs of Korean science teachers majoring in chemical education and their preferences for online and on-site training, *Int. J. Sci. Educ.*, **26**(10), 1269-1289.
- Noh T., Jeon K. and Huffman D., (2005), The effects of thinking aloud pair problem solving on high school students' chemistry problem-solving performance and verbal interactions, *J. Chem. Educ.*, **82**(10), 1558-1564.
- Nyachwaya J. M., Mohamed A., Roehrig G. H., Wood N. B., Kern A. L. and Schneider J. L., (2011), The development of an open-ended drawing tool: an alternative diagnostic tool for assessing students' understanding of the particulate nature of matter, *Chem. Educ. Res. Pract.*, **12**(2), 121-132.
- Obenland C. A., Munson A. H. and Hutchinson J. S., (2013), Silent and vocal students in a large active learning chemistry classroom: comparison of performance and motivational factors, *Chem. Educ. Res. Pract.*, **14**(1), 73-80.

- Oliver-Hoyo M. T. and Allen D., (2005), Attitudinal effects of a student-centered active learning environment, *J. Chem. Educ.*, **82**(6), 944-949.
- Oliver-Hoyo M. T., Allen D., Hunt W. F., Hutson J. and Pitts A., (2004), Effects of an active learning environment: teaching innovations at a research I institution, *J. Chem. Educ.*, **81**(3), 441-448.
- Onwu G. O. M. and Randall E., (2006), Some aspects of students' understanding of a representational model of the particulate nature of matter in chemistry in three different countries, *Chem. Educ. Res. Pract.*, **7**(4), 226-239.
- Orgill M. and Sutherland A., (2008), Undergraduate chemistry students' perceptions of and misconceptions about buffers and buffer problems, *Chem. Educ. Res. Pract.*, **9**(2), 131-143.
- Österlund L., Berg A. and Ekborg M., (2010), Redox models in chemistry textbooks for the upper secondary school: Friend or foe?, *Chem. Educ. Res. Pract.*, **11**(3), 182-192.
- Othman J., Treagust D. F. and Chandrasegaran A. L., (2008), An investigation into the relationship between students' conceptions of the particulate nature of matter and their understanding of chemical bonding, *Int. J. Sci. Educ.*, **30**(11), 1531-1550.
- Overman M., Vermunt J. D., Meijer P. C., Bulte A. M. W. and Brekelmans M., (2013), Textbook questions in context-based and traditional chemistry curricula analysed from a content perspective and a learning activities perspective, *Int. J. Sci. Educ.*, **35**(17), 2954-2978.
- Overton T. L. and Potter N. M., (2011), Investigating students' success in solving and attitudes towards context-rich open-ended problems in chemistry, *Chem. Educ. Res. Pract.*, **12**(3), 294-302.
- Overton T., Potter N. and Leng C., (2013), A study of approaches to solving open-ended problems in chemistry, *Chem. Educ. Res. Pract.*, **14**(4), 468-475.
- Øyehaug A. B. and Holt A., (2013), Students' understanding of the nature of matter and chemical reactions—a longitudinal study of conceptual restructuring, *Chem. Educ. Res. Pract.*, **14**(4), 450-467.
- Özkaya A. R., Üce M., Sarıçayır H. and Şahin M., (2006), Effectiveness of a conceptual change-oriented teaching strategy to improve students' understanding of galvanic cells, *J. Chem. Educ.*, **83**(11), 1719-1723.
- Özmen H., (2008), Determination of students' alternative conceptions about chemical equilibrium: a review of research and the case of Turkey, *Chem. Educ. Res. Pract.*, **9**(3), 225-233.
- Padilla K. and Driel J. van., (2011), The relationships between PCK components: the case of quantum chemistry professors, *Chem. Educ. Res. Pract.*, **12**(3), 367-378.
- Papageorgiou G., Grammaticopoulou M. and Johnson P. M., (2010), Should we teach primary pupils about chemical change?, *Int. J. Sci. Educ.*, **32**(12), 1647-1664.
- Papageorgiou G., Kogianni E. and Makris N., (2007), Primary teachers' views and descriptions regarding some science activities, *Chem. Educ. Res. Pract.*, **8**(1), 52-60.
- Papageorgiou G., Stamovlasis D. and Johnson P. M., (2010), Primary teachers' particle ideas and explanations of physical phenomena: effect of an in-service training course, *Int. J. Sci. Educ.*, **32**(5), 629-652.
- Papaphotis G. and Tsaparlis G., (2008), Conceptual versus algorithmic learning in high school chemistry: the case of basic quantum chemical concepts: Part 1. Statistical analysis of a quantitative study, *Chem. Educ. Res. Pract.*, **9**(4), 323-331.
- Papaphotis G. and Tsaparlis G., (2008), Conceptual versus algorithmic learning in high school chemistry: the case of basic quantum chemical concepts: Part 2. Students' common errors, misconceptions and difficulties in understanding, *Chem. Educ. Res. Pract.*, **9**(4), 332-340.
- Pappa E. T. and Tsaparlis G., (2011), Evaluation of questions in general chemistry textbooks according to the form of the questions and the Question-Answer Relationship (QAR): the case of intra- and intermolecular chemical bonding, *Chem. Educ. Res. Pract.*, **12**(2), 262-270.
- Parchmann I., Gräsel C., Baer A., Nentwig P., Demuth R., Ralle B. and the ChiK Project Group, (2006), "Chemie im Kontext": a symbiotic implementation of a context-based teaching and learning approach, *Int. J. Sci. Educ.*, **28**(9), 1041-1062.
- Park E. J. and Light G., (2009), Identifying atomic structure as a threshold concept: student mental models and troublesomeness, *Int. J. Sci. Educ.*, **31**(2), 233-258.
- Parker L. L. and Loudon G. M., (2013), Case study using online homework in undergraduate organic chemistry: Results and student attitudes, *J. Chem. Educ.*, **90**, 37-44.

- Pekdağ B. and Azizoğlu N., (2013), Semantic mistakes and didactic difficulties in teaching the “amount of substance” concept: a useful model, *Chem. Educ. Res. Pract.*, **14**(1), 117-129.
- Pentecost T. C. and Barbera J., (2013), Measuring learning gains in chemical education: a comparison of two methods, *J. Chem. Educ.*, **90**(7), 839-845.
- Pienta N. J., (2004), Measuring productivity in college-level chemistry education scholarship, *J. Chem. Educ.*, **81**(4), 579-583.
- Pierrri E., Karatrantou A. and Panagiotakopoulos C., (2008), Exploring the phenomenon of ‘change of phase’ of pure substances using the Microcomputer-Based-Laboratory (MBL) system, *Chem. Educ. Res. Pract.*, **9**(3), 234-239.
- Pinarbaşı T., Canpolat N. and Bayrakçeken, S. and Geban O., (2006), An investigation of effectiveness of conceptual change text-oriented instruction on students’ understanding of solution concepts, *Res. Sci. Educ.*, **36**, 313-335.
- Pinarbaşı T., Sozbilir M. and Canpolat N., (2009), Prospective chemistry teachers’ misconceptions about colligative properties: boiling point elevation and freezing point depression, *Chem. Educ. Res. Pract.*, **10**(4), 273-280.
- Piquette J. S. and Heikkinen H. W., (2005), Strategies reported used by instructors to address student alternate conceptions in chemical equilibrium, *J. Res. Sci. Teach.*, **42**(10), 1112-1134.
- Plass J. L., Milne C., Homer B. D., Schwartz R. N., Hayward E. O., Jordan T., Verkuilen J., Ng F., Wang Y. and Barrientos J., (2012), Investigating the effectiveness of computer simulations for chemistry learning, *J. Res. Sci. Teach.*, **49**(3), 394-419.
- Platt T., Roth V. and Kampmeier J. A., (2008), Sustaining change in upper level courses: peer-led workshops in organic chemistry and biochemistry, *Chem. Educ. Res. Pract.*, **9**(2), 144-148.
- Pogačnik L. and Cigić B., (2006), How to motivate students to study before they enter the lab, *J. Chem. Educ.*, **83**(7), 1094-1098.
- Potgieter M., Ackermann M. and Fletcher L., (2010), Inaccuracy of self-evaluation as additional variable for prediction of students at risk of failing first-year chemistry, *Chem. Educ. Res. Pract.*, **11**(1), 17-24.
- Potgieter M. and Davidowitz B., (2011), Preparedness for tertiary chemistry: multiple applications of the Chemistry Competence Test for diagnostic and prediction purposes, *Chem. Educ. Res. Pract.*, **12**(2), 193-204.
- Potgieter M., Harding A. and Engelbrecht J., (2008), Transfer of algebraic and graphical thinking between mathematics and chemistry, *J. Res. Sci. Teach.*, **45**(2), 197-218.
- Price D. S. and Brooks D. W., (2012), Extensiveness and perceptions of lecture demonstrations in the high school chemistry classroom, *Chem. Educ. Res. Pract.*, **13**(4), 420-427.
- Prins G. T., Bulte A. M. W., Driel J. H. van. and Pilot A., (2008), Selection of authentic modelling practices as contexts for chemistry education, *Int. J. Sci. Educ.*, **30**(14), 1867-1890.
- Prins G. T., Bulte A. M. W., Driel J. H. van. and Pilot A., (2009), Students’ involvement in authentic modelling practices as contexts in chemistry education, *Res. Sci. Educ.*, **39**, 681-700.
- Prins G. T., Bulte A. M. W. and Pilot A., (2011), Evaluation of a design principle for fostering students’ epistemological views on models and modelling using authentic practices as contexts for learning in chemistry education, *Int. J. Sci. Educ.*, **33**(11), 1539-1569.
- Putti A. (2011), High school students' attitudes and beliefs on using the science writing heuristic in an advanced placement chemistry class, *J. Chem. Educ.*, **88**(4), 516-521.
- Pyburn D. T., Pazicni S., Benassi V. A. and Tappin E. E., (2013), Assessing the relation between language comprehension and performance in general chemistry, *Chem. Educ. Res. Pract.*, **14**(4), 524-541.
- Raker J. R. and Towns M. H., (2010), Benchmarking problems used in second year level organic chemistry instruction, *Chem. Educ. Res. Pract.*, **11**(1), 25-32.
- Raker J. R. and Towns M. H., (2012), Designing undergraduate-level organic chemistry instructional problems: seven ideas from a problem-solving study of practicing synthetic organic chemists, *Chem. Educ. Res. Pract.*, **13**(3), 277-285.
- Raker J. R., Trate J. M., Holme T. A. and Murphy K., (2013), Adaptation of an instrument for measuring the cognitive complexity of organic chemistry chemistry exam items, *J. Chem. Educ.*, **90**(10), 1290-1295.

- Ramnarain U. and Joseph A., (2012), Learning difficulties experienced by grade 12 South African students in the chemical representation of phenomena, *Chem. Educ. Res. Pract.*, **13**(4), 462-470.
- Rath K. A., Peterfreund A., Bayliss F., Runquist E. and Simonis U., (2012), Impact of supplemental instruction in entry-level chemistry courses at a midsized public university, *J. Chem. Educ.*, **89**(4), 449-455.
- Reardon R. F., Traverse M. A., Feakes D. A. Gibbs K. A. and Rohde R. E., (2010), Discovering the determinants of chemistry course perceptions in undergraduate students, *J. Chem. Educ.*, **87**(6), 643-646.
- Regan Á., Childs P. and Hayes S., (2011), The use of an intervention programme to improve undergraduate students' chemical knowledge and address their misconceptions, *Chem. Educ. Res. Pract.*, **12**(2), 219-227.
- Reigosa C. and Jiménez-Aleixandre M., (2007), Scaffolded problem-solving in the physics and chemistry laboratory: difficulties hindering students' assumptions of responsibility, *Int. J. Sci. Educ.*, **29**(3), 307-329.
- Rens L. van., Muijlwijk J. van., Beishuizen J. and Schee J. van der., (2013), Upper secondary chemistry students in a pharmacology research community, *Int. J. Sci. Educ.*, **35**(6), 1012-1036.
- Rens L. van., Schee J. van der. and Pilot A., (2009), Teaching molecular diffusion using an inquiry approach: diffusion activities in a secondary school inquiry-learning community, *J. Chem. Educ.*, **86**(12), 1437-1441.
- Rice D. C., (2005), I didn't know oxygen could boil! What preservice and inservice elementary teachers' answers to 'simple' science questions reveals about their subject matter knowledge, *Int. J. Sci. Educ.*, **27**(9), 1059-1082.
- Richards-Babb M. and Jackson J. K., (2011), Gendered responses to online homework use in general chemistry, *Chem. Educ. Res. Pract.*, **12**(4), 409-419.
- Richardson C. D., Richardson J. S., Sirochman R., Weiner S. W., Farwell M., Putnam-Evans C., Booth D. and Bateman R. C. Jr., (2005), Assessment of molecular construction in undergraduate biochemistry, *J. Chem. Educ.*, **82**(12), 1854-1858.
- Robelia B., McNeill K., Wammer K. and Lawrenz F., (2010), Investigating the impact of adding an environmental focus to a developmental chemistry course, *J. Chem. Educ.*, **87**(2), 216-220.
- Rodrigues S., (2007), Factors that influence pupil engagement with science simulations: the role of distraction, vividness, logic, instruction and prior knowledge, *Chem. Educ. Res. Pract.*, **8**(1), 1-12.
- Rodrigues S., (2011), Using chemistry simulations: attention capture, selective amnesia and inattentional blindness, *Chem. Educ. Res. Pract.*, **12**(1), 40-46.
- Rodrigues R. A. B. and Bond-Robinson J., (2006), Comparing faculty and student perspectives of graduate teaching assistants' teaching, *J. Chem. Educ.*, **83**(2), 305-312.
- Roehrig G. and Garrow S., (2007), The impact of teacher classroom practices on student achievement during the implementation of a reform-based chemistry curriculum, *Int. J. Sci. Educ.*, **29**(14), 1789-1811.
- Rollnick M., Bennett J., Rhemtula M., Dharsey N. and Ndlovu T., (2008), The place of subject matter knowledge in pedagogical content knowledge: a case study of South African teachers teaching the amount of substance and chemical equilibrium, *Int. J. Sci. Educ.*, **30**(10), 1365-1387.
- Rosenthal D. P. and Sanger M. J., (2012), Student misinterpretations and misconceptions based on their explanations of two computer animations of varying complexity depicting the same oxidation-reduction reaction, *Chem. Educ. Res. Pract.*, **13**(4), 471-483.
- Rosenthal D. P. and Sanger M. J., (2013), How does viewing one computer animation affect students' interpretations of another animation depicting the same oxidation-reduction reaction?, *Chem. Educ. Res. Pract.*, **14**(3), 286-296.
- Ruddick K. R., Parrill A. L. and Petersen R. L., (2012), Introductory molecular orbital theory: an honors general chemistry computational lab as implemented using three-dimensional modeling software, *J. Chem. Educ.*, **89**(11), 1358-1363.
- Rushton G. T., Hardy R. C., Gwaltney K. P. and Lewis S. E., (2008), Alternative conceptions of organic chemistry topics among fourth year chemistry students, *Chem. Educ. Res. Pract.*, **9**(2), 122-130.
- Russell C. B. and Weaver G. C., (2011), A comparative study of traditional, inquiry-based, and research-based laboratory curricula: impacts on understanding of the nature of science, *Chem. Educ. Res. Pract.*, **12**(1), 57-67.

- Ryan B. J., (2013), Line up, line up: using technology to align and enhance peer learning and assessment in a student centred foundation organic chemistry module, *Chem. Educ. Res. Pract.*, **14**(3), 229-239.
- Sadler P. M. and Tai R. H. (2007), High school chemistry instructional practices and their association with college chemistry grades, *J. Chem. Educ.*, **84**(6), 1040-1046.
- Saitta E. K. H., Gitting M. J. and Geiger C., (2011), Learning dimensional analysis through collaboratively working with manipulatives, *J. Chem. Educ.*, **88**(7), 910-915.
- Salah H. and Dumon A., (2011), Conceptual integration of hybridization by Algerian students intending to teach physical sciences, *Chem. Educ. Res. Pract.*, **12**(4), 443-453.
- Salloum S. L. and BouJaoude S., (2008), Careful! Is it H<sub>2</sub>O? Teachers' conceptions of chemicals, *Int. J. Sci. Educ.*, **30**(1), 33-64.
- Salta K., Gekos M., Petsimeri I. and Koulougliotis, (2012), Discovering factors that influence the decision to pursue a chemistry-related career: a comparative analysis of the experiences of non scientist adults and chemistry teachers in Greece, *Chem. Educ. Res. Pract.*, **13**(4), 437-446.
- Salta K. and Tzougraki C., (2004), Attitudes toward chemistry among 11th grade students in high schools in Greece, *Sci. Educ.*, **88**, 535-547.
- Salta K. and Tzougraki C., (2011), Conceptual versus algorithmic problem-solving: focusing on problems dealing with conservation of matter in chemistry, *Res. Sci. Educ.*, **41**, 587-609.
- Samarapungavan A., Westby E. L. and Bodner G. M., (2006), Contextual epistemic development in science: a comparison of chemistry students and research chemists, *Sci. Educ.*, **90**, 468-495.
- Sampson V. and Walker J. P., (2012), Argument-driven inquiry as a way to help undergraduate students write to learn by learning to write in chemistry, *Int. J. Sci. Educ.*, **34**(10), 1443,1485.
- Sanabria-Ríos D. and Bretz S. L., (2010), Investigating the relationship between faculty cognitive expectations about learning chemistry and the construction of exam questions, *Chem. Educ. Res. Pract.*, **11**(3), 212-217.
- Sandi-Urena S., Cooper M. and Stevens R., (2012), Effect of cooperative problem-based lab instruction on metacognition and problem-solving skills, *J. Chem. Educ.*, **89**(6), 700-706.
- Sandi-Urena S., Cooper M. M. and Gatlin T. A., (2011), Graduate teaching assistants' epistemological and metacognitive development, *Chem. Educ. Res. Pract.*, **12**(1), 92-100.
- Sandi-Urena S., Cooper M. M., Gatlin T. A. and Bhattacharyya G., (2011), Students' experience in a general chemistry cooperative problem based laboratory, *Chem. Educ. Res. Pract.*, **12**(4), 434-442.
- Sanger M. J., (2005), Evaluating students' conceptual understanding of balanced equations and stoichiometric ratios using a particulate drawing, *J. Chem. Educ.*, **82**(1), 131-134.
- Sanger M. J., (2007), The effects of inquiry-based instruction on elementary teaching majors' chemistry content knowledge, *J. Chem. Educ.*, **84**(6), 1035-1039.
- Sanger M. J., (2008), How does inquiry-based instruction affect teaching majors' views about teaching and learning science?, *J. Chem. Educ.*, **85**(2), 297-302.
- Sanger M. J., Campbell E., Felker J. and Spencer C., (2007), "Concept learning versus problem solving": Does particle motion have an effect?, *J. Chem. Educ.*, **84**(5), 875-879.
- Sanger M. J. and Phelps A. J., (2007), What are students thinking when they pick their answer?: a content analysis of students' explanations of gas properties, *J. Chem. Educ.*, **84**(5), 870-874.
- Sanger M. J., Vaughn C. K. and Binkley D. A., (2013), Concept learning versus problem solving: evaluating a threat to the validity of a particulate gas law question, *J. Chem. Educ.*, **90**(6), 700-709.
- Sarantopoulos P. and Tsaparlis G., (2004), Analogies in chemistry teaching as a means of attainment of cognitive and affective objectives: a longitudinal study in a naturalistic setting, using analogies with a strong social context, *Chem. Educ. Res. Pract.*, **5**(1), 33-50.
- Scalise K., Claesgens J., Wilson M. and Stacy A., (2006), Contrasting the expectations for student understanding of chemistry with levels achieved: a brief case-study of student nurses, *Chem. Educ. Res. Pract.*, **7**(3), 170-184.
- Schallies M. and Eysel C., (2004), Learning beyond school:

establishing a laboratory for sustainable education, *Chem. Educ. Res. Pract.*, **5**(2), 111-126.

Schmid S., Youl D. J., George A. V. and Read J. R., (2011), Effectiveness of a short, intense bridging course for scaffolding students commencing university-level study of chemistry, *Int. J. Sci. Educ.*, **34**(8), 1211-1234.

Schmidt H., Kaufmann B. and Treagust D. F., (2009), Students' understanding of boiling points and intermolecular forces, *Chem. Educ. Res. Pract.*, **10**(4), 265-272.

Schmidt H., Marohn A. and Harrison A. G., (2007), Factors that prevent learning in electrochemistry, *J. Res. Sci. Teach.*, **44**(2), 258-283.

Schroeder J. D. and Greenbowe T. J., (2008), Implementing POGIL in the lecture and the science writing heuristic in the laboratory—student perceptions and performance in undergraduate organic chemistry, *Chem. Educ. Res. Pract.*, **9**(2), 149-156.

Schurmeier K. D., Atwood C.H., Shepler C. G. and Lautenschlager G. J., (2010), Using item response theory to assess changes in student performance based on changes in question wording, *J. Chem. Educ.*, **87**(11), 1268-1272.

Schuttlefield J. D., Kirk J., Pienta N. J. and Tang H., (2012), Investigating the effect of complexity factors in gas law problems, *J. Chem. Educ.*, **89**(5), 586-591.

Shwartz Y., Ben-Zvi R. and Hofstein A., (2005), The importance of involving high-school chemistry teachers in the process of defining the operational meaning of 'chemical literacy', *Int. J. Sci. Educ.*, **27**(3), 323-344.

Scott F. J., (2012), Is mathematics to blame? An investigation into high school students' difficulty in performing calculations in chemistry, *Chem. Educ. Res. Pract.*, **13**(3), 330-336.

Seah L. H., Clarke D. J. and Hart C. E., (2011), Understanding students' language use about expansion through analysing their lexicogrammatical resources, *Sci. Educ.*, **95**, 852-876.

Seery M. K., (2009), The role of prior knowledge and student aptitude in undergraduate performance in chemistry: a correlation-prediction study, *Chem. Educ. Res. Pract.*, **10**(3), 227-232.

Sendur G. and Toprak M., (2013), The role of conceptual change texts to improve students' understanding of alkenes, *Chem. Educ. Res. Pract.*, **14**(4), 431-449.

Senocak E., Taskesenligil Y. and Sozbilir M., (2007), A study on teaching gases to prospective primary science teachers through problem-based learning, *Res. Sci. Educ.*, **37**, 279-290.

Sesen B. A., (2013), Diagnosing pre-service science teachers' understanding of chemistry concepts by using computer-mediated predict-observe-explain tasks, *Chem. Educ. Res. Pract.*, **14**(3), 239-246.

Sesen B. A. and Tarhan L., (2013), Inquiry-based laboratory activities in electrochemistry: high school students' achievements and attitudes, *Res. Sci. Educ.*, **43**, 413-435.

Shadle S. E., Brown E. C., Towns M. H. and Warner D. L., (2012), A rubric for assessing students' experimental problem-solving ability, *J. Chem. Educ.*, **89**(3), 319-325.

She H.-C., (2004), Facilitating changes in ninth grade students' understanding of dissolution and diffusion through DSLM instruction, *Res. Sci. Educ.*, **34**, 503-525.

Sheppard K., (2006), High school students' understanding of titrations and related acid-base phenomena, *Chem. Educ. Res. Pract.*, **7**(1), 32-45.

Shields S. P., Hoglebe M. C., Spees W. M., Handlin L. B., Noelken G. P., Riley J. M. and Frey R. F., (2012), A transition program for underprepared students in general chemistry: diagnosis, implementation, and evaluation, *J. Chem. Educ.*, **89**(8), 995-1000.

Shwartz Y., Ben-Zvi R. and Hofstein A., (2006), Chemical literacy: what does this mean to scientists and school teachers?, *J. Chem. Educ.*, **83**(10), 1557-1561.

Shwartz Y., Ben-Zvi R. and Hofstein A., (2006), The use of scientific literacy taxonomy for assessing the development of chemical literacy among high-school students, *Chem. Educ. Res. Pract.*, **7**(4), 203-225.

Shwartz Y. and Katchevitch D., (2013), Using wiki to create a learning community for chemistry teacher leaders, *Chem. Educ. Res. Pract.*, **14**(3), 312-323.

Smith C. J., (2012), Improving the school-to-university transition: Using a problem-based approach to teach practical skills whilst simultaneously developing students' independent study skills, *Chem. Educ. Res. Pract.*, **13**(4), 490-499.

- Smith J. D., (2013), Student attitudes toward flipping the general chemistry classroom, *Chem. Educ. Res. Pract.*, **14**(4), 607-614.
- Smith K. C. and Nakhleh M. B., (2011), University students' conceptions of bonding in melting and dissolving phenomena, *Chem. Educ. Res. Pract.*, **12**(4), 398-408.
- Smithenry D. W., (2010), Integrating guided inquiry into a traditional chemistry curricular framework, *Int. J. Sci. Educ.*, **32**(13), 1689-1714.
- Smothers S. M. and Goldston M. J., (2010), Atoms, elements, molecules, and matter: an investigation into the congenitally blind adolescents' conceptual frameworks on the nature of matter, *Sci. Educ.*, **94**, 448-477.
- Sneddon P. H. and Hill R. A., (2011), Perceptions, views and opinions of university students about chemistry learning during practical work at school, *Chem. Educ. Res. Pract.*, **12**(3), 312-321.
- Southam D. C. and Lewis J. E., (2013), Supporting alternative strategies for leaning chemical applications of group theory, *J. Chem. Educ.*, **90**(11), 1425-1432.
- Southam D. C., Shand B., Buntine M. A., Kable S. H., Read J. R. and Morris J. C., (2013), The timing of an experiment in the laboratory program is crucial for the student laboratory experience: acylation of ferrocene as a case study, *Chem. Educ. Res. Pract.*, **14**(4), 476-484.
- Southerland S., Kittleson J., Settlage J. and Lanier K., (2005), Individual and group meaning-making in an urban third grade classroom: red fog, cold cans, and seeping vapor, *J. Res. Sci. Teach.*, **42**(9), 1032-1061.
- Sözbilir, M., (2004), What makes physical chemistry difficult?: perceptions of Turkish chemistry undergraduates and lecturers, *J. Chem. Educ.*, **81**(4), 573-578.
- Sreenivasulu B. and Subramaniam R., (2013), University students' understanding of chemical thermodynamics, *Int. J. Sci. Educ.*, **35**(4), 601-635.
- St Clair-Thompson H., Overton T. and Bugler M., (2012), Mental capacity and working memory in chemistry: algorithmic versus open-ended problem solving, *Chem. Educ. Res. Pract.*, **13**(4), 484-489.
- Stains M., Escriu-Sune M., De Santizo M. L. M. A. and Sevian H., (2011), Assessing secondary and college students' implicit assumptions about the particulate nature of matter: development and validation of the structure and motion of matter survey, *J. Chem. Educ.*, **88**(10), 1359-1365.
- Stains M. and Talanquer V., (2007), A<sub>2</sub>: element or compound?, *J. Chem. Educ.*, **84**(5), 880-883.
- Stains M. and Talanquer V., (2007), Classification of chemical substances using particulate representations of matter: an analysis of student thinking, *Int. J. Sci. Educ.*, **29**(5), 643-661.
- Stains M. and Talanquer V., (2008), Classification of chemical reactions: stages of expertise, *J. Res. Sci. Teach.*, **45**(7), 771-793.
- Stamovlasis D., Papageorgiou G. and Tsitsipis G., (2013), The coherent versus fragmented knowledge hypotheses for the structure of matter: an investigation with a robust statistical methodology, *Chem. Educ. Res. Pract.*, **14**(4), 485-495.
- Stamovlasis D., Tsaparlis G., Kamilatos C., Papaoikonomou D. and Zarotiadou E., (2005), Conceptual understanding versus algorithmic problem solving: further evidence from a national chemistry examination, *Chem. Educ. Res. Pract.*, **6**(2), 104-118.
- Stamovlasis D., Tsitsipis G. and Papageorgiou G., (2010), The effect of logical thinking and two cognitive styles on understanding the structure of matter: an analysis with the random walk method, *Chem. Educ. Res. Pract.*, **11**(3), 173-181.
- Stefani C. and Tsaparlis G., (2009), Students' levels of explanations, models, and misconceptions in basic quantum chemistry: a phenomenographic study, *J. Res. Sci. Teach.*, **46**(5), 520-536.
- Stevens S. Y., Delgado C. and Krajcik J. S., (2010), Developing a hypothetical multi-dimensional learning progression for the nature of matter, *J. Res. Sci. Teach.*, **47**(6), 687-715.
- Stieff M., (2011), Improving representational competence using molecular simulations embedded in inquiry activities, *J. Res. Sci. Teach.*, **48**(10), 1137-1158.
- Stieff M., (2011), Who is a molecule three dimensional? A task-specific role for imagistic reasoning in advanced chemistry, *Sci. Educ.*, **95**, 310-336.
- Stieff M., (2013), Sex differences in the mental rotation of chemistry representations, *J. Chem. Educ.*, **90**(2), 165-170.



- Stieff M., Ryu M., Dixon B. and Hegarty M., (2012), The role of spatial ability and strategy preference for spatial problem solving in organic chemistry, *J. Chem. Educ.*, **89**(7), 854-859.
- Stieff M., Ryu M. and Yip J. C., (2013), Speaking across levels—generating and addressing levels confusion in discourse, *Chem. Educ. Res. Pract.*, **14**(4), 376-389.
- Stolk M. J., Bulte A., De Jong O. and Pilot A., (2012), Evaluating a professional development framework to empower chemistry teachers to design context-based education, *Int. J. Sci. Educ.*, **34**(10), 1487-1508.
- Stolk M. J., De Jong O., Bulte, M. W. A. and Pilot A., (2011), Exploring a framework for profession development in curriculum innovation: empowering teachers for designing context-based chemistry education, *Res. Sci. Educ.*, **41**, 369-388.
- Strickland A. M., Kraft A. and Bhattacharyya G., (2010), What happens when representations fail to represent? Graduate students' mental models of organic chemistry diagrams, *Chem. Educ. Res. Pract.*, **11**(4), 293-301.
- Supasorn S., Suits J. P., Jones L. L. and Vibuljan S., (2008), Impact of a pre-laboratory organic-extraction simulation on comprehension and attitudes of undergraduate chemistry students, *Chem. Educ. Res. Pract.*, **9**(2), 169-181.
- Sweeney A. E. and Paradis, J. A., (2004), Developing a laboratory model for the professional preparation of future science teachers: a situated cognition perspective, *Res. Sci. Educ.*, **34**, 195-219.
- Szteingberg G. A. and Weaver G. C., (2013), Participants' reflections two and three years after an introductory chemistry course-embedded research experience, *Chem. Educ. Res. Pract.*, **14**(1), 23-25.
- Szu E., Nandagopal K., Shavelson R. J., Lopez E. J., Penn J. H., Scharberg M. and Hill G. W., (2011), Understanding academic performance in organic chemistry, *J. Chem. Educ.*, **88**(9), 1238-1242.
- Taagepera M., Arasasingham R. D., King S., Potter F., Martorell I., Ford D., Wu J. and Kearney A. M., (2011), Integrating symmetry in stereochemical analysis in introductory organic chemistry, *Chem. Educ. Res. Pract.*, **12**(3), 322-330.
- Taasobshirazi G. and Glynn S. M., (2009), College students solving chemistry problems: a theoretical model of expertise, *J. Res. Sci. Teach.*, **46**(10), 1070-1089.
- Taber K. S., (2005), Learning quanta: barriers to stimulating transitions in student understanding of orbital ideas, *Sci. Educ.*, **89**, 94-116.
- Taber K. S., (2009), College students' conceptions of chemical stability: the widespread adoption of a heuristic rule out of context and beyond its range of application, *Int. J. Sci. Educ.*, **31**(10), 1333-1358.
- Taber K. S. and Bricheno P., (2009), Coordinating procedural and conceptual knowledge to make sense of word equations: understanding the complexity of a 'simple' completion task at the learner's resolution, *Int. J. Sci. Educ.*, **31**(15), 2021-2055.
- Taber K. S. and Tan K. C. D., (2011), The insidious nature of 'hard-core' alternative conceptions: implications for the constructivist research programme of patterns in high school students' and pre-service teachers' thinking about ionisation energy, *Int. J. Sci. Educ.*, **33**(2), 259-297.
- Taber K. S., Tsapalis G. and Nakiboğlu C., (2012), Student conceptions of ionic bonding: patterns of thinking across three European contexts, *Int. J. Sci. Educ.*, **34**(18), 2843-2873.
- Tai R. H., Sadler P. M. and Loehr J. F., (2005), Factors influencing success in introductory college chemistry, *J. Res. Sci. Teach.*, **42**(9), 987-1012.
- Tai R. H., Ward R. B. and Sadler P. M., (2006), High school chemistry content background of introductory college chemistry students and its association with college chemistry grades, *J. Chem. Educ.*, **83**(11), 1703-1711.
- Taitelbaum D., Mamlok-Naaman R., Carmeli M. and Hofstein A., (2008), Evidence for teachers' change while participating in a continuous professional development programme and implementing the inquiry approach in the chemistry laboratory, *Int. J. Sci. Educ.*, **30**(5), 593-617.
- Tal R. T., (2004), Using a field trip to a wetland as a guide for conceptual understanding in environmental education—a case study of a pre-service teacher's research, *Chem. Educ. Res. Pract.*, **5**(2), 127-142.
- Talanquer V., (2008), Students' predictions about the sensory properties of chemical compounds: additive versus emergent frameworks, *Sci. Educ.*, **92**, 96-114.
- Talanquer V., (2007), Explanations and teleology in chemistry education, *Int. J. Sci. Educ.*, **29**(7), 853-870.

- Talanquer V., (2010), Exploring dominant types of explanations built by general chemistry students, *Int. J. Sci. Educ.*, **32**(18), 2393-2412.
- Tan K. C. D. and Taber K. S., (2009), Ionization energy: implications of preservice teachers' conceptions, *J. Chem. Educ.*, **86**(5), 623-629.
- Tan K. C. D., Taber K. S., Liu X., Coll R. K., Lorenzo M., Li J., Goh N. K. and Chia L. S., (2008), Students' conceptions of ionisation energy: a cross-cultural study, *Int. J. Sci. Educ.*, **30**(2), 263-283.
- Tan K. C. D., Treagust D. F., Chandrasegaran A. L. and Mocerino M., (2010), Kinetics of acid reactions: making sense of associated concepts, *Chem. Educ. Res. Pract.*, **11**(4), 267-280.
- Tan K. D., Taber K. S., Goh N. and Chia L., (2005), The ionisation energy diagnostic instrument: a two-tier multiple-choice instrument to determine high school students' understanding of ionisation energy, *Chem. Educ. Res. Pract.*, **6**(4), 180-197.
- Tang H. & Pienta N., (2012), Eye-tracking study of complexity in gas law problems, *J. Chem. Educ.*, **89**(8), 988-994.
- Tarhan L., Ayar-Kayali H., Urek, R. O. and Acar B., (2008), Problem-based learning in 9th grade chemistry class: 'intermolecular forces', *Res. Sci. Educ.*, **38**, 285-300.
- Tarhan L. and Sesen B. A., (2012), Jigsaw cooperative learning: acid-base theories, *Chem. Educ. Res. Pract.*, **13**(3), 307-313.
- Tasker R. and Dalton R., (2006), Research into practice: visualisation of the molecular world using animations, *Chem. Educ. Res. Pract.*, **7**(2), 141-159.
- Taylor D., Rogers A. L. and Veal W. R., (2009), Using self-reflection to increase science process skills in the general chemistry laboratory, *J. Chem. Educ.*, **86**(3), 393-398.
- Tekin B. B. and Nakiboğlu C., (2006), Identifying students' misconceptions about nuclear chemistry: a study of Turkish high school students, *J. Chem. Educ.*, **83**(11), 1712-1718.
- Teixeira-Dias J. J. C., Jesus H. P. de, Souza F. N. de and Watts M., (2005), Teaching for quality learning in chemistry, *Int. J. Sci. Educ.*, **27**(9), 1123-1137.
- Tien L. T., Teichert M. A. and Rickey D., (2007), Effectiveness of a MORE laboratory module in prompting students to revise their molecular-level ideas about solutions, *J. Chem. Educ.*, **84**(1), 175-181.
- Toplis R., (2008), Probing student teachers' subject content knowledge in chemistry: case studies using dynamic computer models, *Chem. Educ. Res. Pract.*, **9**(1), 11-17.
- Tosun C. and Taskesenligil Y., (2013), The effect of problem-based learning on undergraduate students' learning about solutions and their physical properties and scientific processing skills, *Chem. Educ. Res. Pract.*, **14**(1), 36-50.
- Tóth Z., (2007), Mapping students' knowledge structure in understanding density, mass percent, molar mass, molar volume and their application in calculations by the use of the knowledge space theory, *Chem. Educ. Res. Pract.*, **8**(4), 376-389.
- Tóth Z. and Ludányi L., (2007), Combination of phenomenography with knowledge space theory to study students' thinking patterns in describing an atom, *Chem. Educ. Res. Pract.*, **8**(3), 327-336.
- Toto J. and Booth K., (2008), Effects and implications of mini-lectures on learning in first-semester general chemistry, *Chem. Educ. Res. Pract.*, **9**(3), 259-266.
- Towns M. H., (2010), Developing learning objectives and assessment plans at a variety of institutions: examples and case studies, *J. Chem. Educ.*, **87**(1), 91-96.
- Towns M. H. and Kraft A., (2012), The 2010 rankings of chemical education and science education journals by faculty engaged in chemical education research, *J. Chem. Educ.*, **89**(1), 16-20.
- Towns M. H., Raker J. R., Becker N., Harle M. and Sutcliffe J., (2012), The biochemistry tetrahedron and the development of the taxonomy of biochemistry external representations (TOBER), *Chem. Educ. Res. Pract.*, **13**(3), 296-306.
- Treagust D. F., Chandrasegaran A. L., Zain A. N. M., Ong E. T., Karpudewan M. and Halim L., (2011), Evaluation of an intervention instructional program to facilitate understanding of basic particle concepts among students enrolled in several levels of study, *Chem. Educ. Res. Pract.*, **12**(2), 251-261.
- Treagust D. F., Chittleborough G. D. and Mamiala T. L., (2004), Students' understanding of the descriptive and

- predictive nature of teaching models in organic chemistry, *Res. Sci. Educ.*, **34**, 1-20.
- Treagust D. F., Tan K. C. D., Goh N. K. and Chia L. S., (2004), Major sources of difficulty in students' understanding of basic inorganic qualitative analysis, *J. Chem. Educ.*, **81**(5), 725-732.
- Tsaparlis G. and Papaphotis G., (2009), High-school students' conceptual difficulties and attempts at conceptual change: the case of basic quantum chemical concepts, *Int. J. Sci. Educ.*, **31**(7), 895-930.
- Tsitsipis G., Stamovlasis D. and Papageorgiou G., (2010), The effect of three cognitive variables on students' understanding of the particulate nature of matter and its changes of state, *Int. J. Sci. Educ.*, **32**(8), 987-1016.
- Turányi T. and Tóth Z., (2013), Hungarian university students' misunderstandings in thermodynamics and chemical kinetics, *Chem. Educ. Res. Pract.*, **14**(1), 105-116.
- Turkoguz S., (2012), Learn to teach chemistry using visual media tools, *Chem. Educ. Res. Pract.*, **13**(4), 401-409.
- Turner M., VanderHeide K. and Fynewever H., (2011), Motivations for and barriers to the implementation of diagnostic assessment practices—a case study, *Chem. Educ. Res. Pract.*, **12**(2), 142-157.
- Tuvi-Arad I. and Blonder R., (2010), Continuous symmetry and chemistry teachers: learning advanced chemistry content through novel visualization tools, *Chem. Educ. Res. Pract.*, **11**(1), 48-58.
- Urhahne D., Nick S. and Schanze S., (2009), The effect of three-dimensional simulations on the understanding of chemical structures and their properties, *Res. Sci. Educ.*, **39**, 495-513.
- Uzuntiryaki E. and Aydın Y. C., (2009), Development and validation of chemistry self-efficacy scale for college students, *Res. Sci. Educ.*, **39**, 539-551.
- Uzuntiryaki E., Boz Y. and Kirbulut D., (2010), Do pre-service chemistry teachers reflect their beliefs about constructivism in their teaching practices? *Res. Sci. Educ.*, **40**, 403-424.
- Vachliotis T., Salta K., Vasiliou P. and Tzougraki C., (2011), Exploring novel tools for assessing high school students' meaningful understanding of organic reactions, *J. Chem. Educ.*, **88**(3), 337-345.
- Vachliotis T., Salta K., Vasiliou P. and Tzougraki C., (2013), Meaningful understanding and systems thinking in organic chemistry: validating measurement and exploring relationships, *Res. Sci. Educ.*, DOI 10.1007/s11165-013-9382-x.
- Vaino K., Holbrook J. and Rannikmäe M., (2012), Stimulating students' intrinsic motivation for learning chemistry through the use of context-based learning modules, *Chem. Educ. Res. Pract.*, **13**(4), 410-419.
- Veal W. R., (2004), Beliefs and knowledge in chemistry teacher development, *Int. J. Sci. Educ.*, **26**(3), 329-351.
- Verdan A. M., Ingallinera J. T. and Bhattacharyya G., (2010), Scientific norms and ethical misconduct: research towards the design of a course in scientific ethics, *Chem. Educ. Res. Pract.*, **11**(2), 118-123.
- Vesterinen V. and Aksela M., (2009), A novel course of chemistry as a scientific discipline: how do prospective teachers perceive nature of chemistry through visits to research groups?, *Chem. Educ. Res. Pract.*, **10**(2), 132-141.
- Vhurumuku E., (2011), High school chemistry students' scientific epistemologies and perceptions of the nature of laboratory inquiry, *Chem. Educ. Res. Pract.*, **12**(1), 47-56.
- Vhurumuku E., Holtman L., Mikalsen O. and Kolsto S. D., (2006), An investigation of Zimbabwe high school chemistry students' laboratory work-based images of the nature of science, *J. Res. Sci. Teach.*, **43**(2), 127-149.
- Vician C., Charlesworth D. D. and Charlesworth P., (2006), Students' perspectives of the influence of web-enhanced coursework on incidences of cheating, *J. Chem. Educ.*, **83**(9), 1368-1375.
- Villafañe S. M., Loertscher J., Minderhout V. and Lewis J. E., (2011), Uncovering students' incorrect ideas about foundational concepts for biochemistry, *Chem. Educ. Res. Pract.*, **12**(2), 210-218.
- Voegel P. D., Quashnock K. A. and Heil, K. M., (2005), The student-to-student chemistry initiative: the impact of chemistry demonstration programs presented by high school students at elementary schools, *J. Chem. Educ.*, **82**(4), 634-636.
- Vos M. A. J., Taconis R., Jochems W. M. G. and Pilot A., (2010), Teachers implementing context-based teaching materials: a framework for case-analysis in chemistry, *Chem. Educ. Res. Pract.*, **11**(3), 193-206.

- Vos M. A. J., Taconis R., Jochems W. M. G. and Pilot A., (2011), Classroom implementation of context-based chemistry education by teachers: the relation between experiences of teachers and the design of materials, *Int. J. Sci. Educ.*, **33**(10), 1407-1432.
- Waight N. and Gillmeister K., (2013), Teachers and students' conceptions of computer-based models in the context of high school chemistry: elicitation at the pre-intervention stage, *Res. Sci. Educ.*, DOI 10.1007/s11165-013-9385-7.
- Walczak D. E. and Walczak M. M., (2009), Do student attitudes towards science change during a general education chemistry course?, *J. Chem. Educ.*, **86**(8), 985-991.
- Walker J. P. and Sampson V., (2013), Argument-driven inquiry: Using the laboratory to improve undergraduates' science writing skills through meaningful science writing, peer-review, and revision, *J. Chem. Educ.*, **90**(10), 1269-1274.
- Walker J. P. and Sampson V., (2013), Learning to argue and arguing to learn: argument-driven inquiry as a way to help undergraduate chemistry students learn how to construct arguments and engage in argumentation during a laboratory course, *J. Res. Sci. Teach.*, **50**(5), 561-596.
- Walpuski M., Ropohl M. and Sumfleth E., (2011), Students' knowledge about chemical reactions—development and analysis of standard-based test items, *Chem. Educ. Res. Pract.*, **12**(2), 174-183.
- Walz K. A. and Kerr S. C., (2007), "Holes" in student understanding: addressing prevalent misconceptions regarding atmospheric environmental chemistry, *J. Chem. Educ.*, **84**(10), 1693-1696.
- Wamser C. C., (2006), Peer-led team learning in organic chemistry: effects on student performance, success, and persistence in the course, *J. Chem. Educ.*, **83**(10), 1562-1566.
- Wang C. and Barrow L. H., (2013), Exploring conceptual frameworks of models of atomic structures and periodic variations, chemical bonding, and molecular shape and polarity: a comparison of undergraduate general chemistry students with high and low levels of content knowledge, *Chem. Educ. Res. Pract.*, **14**(1), 130-146.
- Wang C.-Y. and Barrow L. H., (2011), Characteristics and levels of sophistication: an analysis of chemistry students' ability to think with mental models, *Res. Sci. Educ.*, **41**, 561-586.
- Watanabe M., Nunes N., Mebane S., Scalise K. and Claesgens J., (2007), "Chemistry" for all, instead of chemistry just for the elite": lessons learned from detracked chemistry classrooms, *Sci. Educ.*, **91**, 683-709.
- Wei B. and Thomas G. P., (2005), Rationale and approaches for embedding scientific literacy into the new junior secondary school chemistry curriculum in the People's Republic of China, *Int. J. Sci. Educ.*, **27**(12), 1477-1493.
- Wei B. and Thomas G. P., (2006), School chemistry curriculum in the P.R. China: in the view of scientific literacy, *Res. Sci. Educ.*, **36**, 403-418.
- Wei S., Liu X., Wang Z. and Wang X., (2012), Using Rasch measurement to develop a computer modeling-based instrument to assess students' conceptual understanding of matter, *J. Chem. Educ.*, **89**(3), 335-345.
- Weitkamp E. and Burnet F., (2007), The chemedian brings laughter to the chemistry classroom, *Int. J. Sci. Educ.*, **29**(15), 1911-1929.
- White H. B. III., Brown S. D. and Johnston M. V., (2005), Contemporary moral problems in chemistry: effect of peer presentations on students' awareness of science and society issues, *J. Chem. Educ.*, **82**(10), 1570-1576.
- Wickman P.-O., (2004), The practical epistemologies of the classroom: a study of laboratory work, *Sci. Educ.*, **88**, 325-344.
- Widanski B. B. and McCarthy W. C., (2009), Assessment of chemistry anxiety in a two-year college, *J. Chem. Educ.*, **86**(12), 1447-1449.
- Williamson V., Huffman J. and Peck L., (2004), Testing students' use of the particulate theory, *J. Chem. Educ.*, **81**(6), 891-896.
- Williamson V. M., Hegarty M., Deslongchamps G., Williamson K. C. and Shultz M. J., (2013), Identifying student use of ball-and-stick images versus electrostatic potential map images via eye tracking, *J. Chem. Educ.*, **90**(2), 159-164.
- Williamson V. M., Lane S. M., Gilbreath T., Tasker R., Ashkenazi G., Williamson K. C. and Macfarlane R. D., (2012), The effect of viewing order of macroscopic and particulate visualizations on students' particulate explanations, *J. Chem. Educ.*, **89**(8), 979-987.

- Winberg T. M. and Berg C. A. R., (2007), Students' cognitive focus during a chemistry laboratory exercise: effects of a computer-simulated prelab, *J. Res. Sci. Teach.*, **44**(8), 1108-1133.
- Wood L. C., Ebenezer J. and Boone R., (2013), Effects of an intellectually caring model on urban African American alternative high school students' conceptual change and achievement in chemistry, *Chem. Educ. Res. Pract.*, **14**(4), 390-407.
- Wren D. and Barbera J., (2013), Gathering evidence for validity during the design, development and qualitative evaluation of thermochemistry concept inventory items, *J. Chem. Educ.*, **90**(12), 1590-1601.
- Xu H. and Talaquer V., (2013), Effect of the level of inquiry of lab experiments on general chemistry students' written reflections, *J. Chem. Educ.*, **90**(1), 21-28.
- Xu H. and Talanquer V., (2013), Effect of the level of inquiry on student interactions in chemistry laboratories, *J. Chem. Educ.*, **90**(1), 29-36.
- Xu X. and Lewis J. E., (2011), Refinement of a chemistry attitude measure for college students, *J. Chem. Educ.*, **88**(5), 561-568.
- Xu X., Villafane S. M., and Lewis J. E., (2013), College students' attitudes toward chemistry, conceptual knowledge and achievement: structural equation model analysis, *Chem. Educ. Res. Pract.*, **14**(2), 188-200.
- Yakmaci-Guzel B., (2013), Preservice chemistry teachers in action: an evaluation of attempts for changing high school students' chemistry misconceptions into more scientific conceptions, *Chem. Educ. Res. Pract.*, **14**(1), 95-104.
- Yalcin F. A., (2012), Pre-service primary science teachers' understandings of the effect of temperature and pressure on solid-liquid phase transition of water, *Chem. Educ. Res. Pract.*, **13**(3), 369-377.
- Yang S.-P. and Li C.-C., (2009), Using student-developed, inquiry-based experiments to investigate the contributions of Ca and Mg to water hardness, *J. Chem. Educ.*, **86**(4), 506-513.
- Yayon M., Mamlok-Naaman R. and Fortus D., (2012), Characterizing and representing students' conceptual knowledge of chemical bonding, *Chem. Educ. Res. Pract.*, **13**(3), 248-267.
- Yeziarski E. J. and Birk J. P., (2006), Misconceptions about the particulate nature of matter: using animations to close the gender gap, *J. Chem. Educ.*, **83**(6), 954-960.
- Yeziarski E. J. and Herrington D. G., (2011), Improving practice with target inquiry: high school chemistry teacher professional development that works, *Chem. Educ. Res. Pract.*, **12**(3), 344-354.
- Yilmaz A. and Alp E., (2006), Students' understanding of matter: the effect of reasoning ability and grade level, *Chem. Educ. Res. Pract.*, **7**(1), 22-31.
- Young K. K. and Talanquer V., (2013), Effect of different types of small-group activities on students' conversations, *J. Chem. Educ.*, **90**(9), 1123-1129.
- Zhang Z. H. and Linn M. C., (2011), Can generating representations enhancing learning with dynamic visualizations?, *J. Res. Sci. Teach.*, **48**(10), 1177-1198.
- Zhang Z. H. and Linn M. C., (2013), Learning from chemical visualizations: comparing generation and selection, *Int. J. Sci. Educ.*, **35**(13), 2174-2197.
- Zielinski T. J., Towns M. H. and Slocum L. E., (2004), Online chemistry modules: interaction and effective faculty facilitation, *J. Chem. Educ.*, **81**(7), 1058-1065.
- Zikovelis V. and Tsaparlis G., (2006), Explicit teaching of problem categorisation and a preliminary study of its effect on student performance—the case of problems in colligative properties of ideal solutions, *Chem. Educ. Res. Pract.*, **7**(2), 114-130.
- Zimrot R. and Ashkenazi G., (2007), Interactive lecture demonstrations: a tool for exploring and enhancing conceptual change, *Chem. Educ. Res. Pract.*, **8**(2), 197-211.
